# Supplementary material for: Distinct progenitor populations mediate regeneration in the zebrafish lateral line
Source: eLife. 2019 Mar 5;8:e43736. doi: 10.7554/eLife.43736 (PMC6433462; doi:10.7554/eLife.43736)
Supplement: Figure 1—source data 1. [file elife-43736-fig1-data1.xlsx]

## Sheet: Sheet1
Fig. 1C - EdU+ hair cells per neuromast (%)				Fig. 1D - EdU+ cells per neuromast				Fig. 1E - %EdU+ cells per neuromast
Mock	Neo			Mock	Neo			Mock HCs	Mock SCs	Neo HCs	Neo SCs
0	60			0	3			0	100	100	0
0	50			2	4			0	100	100	0
0	100			5	8			0	100	75	25
0	100			1	11			0	100	63.6364	36.3636
0	50			4	13			0	100	30.7692	69.2308
0	71.4286			4	8			0	100	62.5	37.5
0	66.6667			4	12			75	25	50	50
23.0769	88.8889			4	8			0	100	100	0
0	80			0	10			0	100	90	10
0	33.3333			2	6			0	100	16.6667	83.3333
0	28.5714			2	4			33.3333	66.6667	50	50
0	100			4	10			28.5714	71.4286	80	20
11.1111	100			6	12			0	100	66.6667	33.3333
18.1818	80			7	8			0	100	100	0
0	57.1429			2	14			0	100	57.1429	42.8571
0	75			0	8			0	100	75	25
0	50			3	6			0	100	66.6667	33.3333
0	66.6667			4	11			0	100	54.5455	45.4545
0	75			0	5			0	100	60	40
0	100			4	6			25	75	66.6667	33.3333
0	66.6667			0	7			50	50	57.1429	42.8571
0	50			2	9			0	100	33.3333	66.6667
0	100			4	10			100	0	80	20
0	85.7143			0	12			100	0	50	50
0	75			4	6			50	50	100	0
7.69231	100			4	10			50	50	80	20
13.3333	100			4	10			28.5714	71.4286	50	50
0	100			3	6			0	100	66.6667	33.3333
13.3333	66.6667			2	4			0	100	100	0
14.2857	50			2	4			100	0	100	0
16.6667	80			4	10			50	50	40	60
0	77.7778			0	7			100	0	100	0
12.5	100			4	10			0	100	60	40
33.3333	75			7	6			66.6667	33.3333	100	0
0	100			5	6			100	0	100	0
0	88.8889			2	8			0	100	100	0
14.2857	100			2	10			25	75	60	40
15.3846	80			4	5			100	0	80	20
13.3333	85.7143			2	8			0	100	75	25
0	83.3333			1	5			0	100	100	0
22.2222	40			3	12			100	0	33.3333	66.6667
22.2222	100			2	17			66.6667	33.3333	35.2941	64.7059
0	100			0	6					100	0
0	83.3333			1	5					100	0
7.14286	100			4	8					75	25
14.2857				1
0				4
0				5
16.6667				2
16.6667				3
