# Supplementary material for: Distinct progenitor populations mediate regeneration in the zebrafish lateral line
Source: eLife. 2019 Mar 5;8:e43736. doi: 10.7554/eLife.43736 (PMC6433462; doi:10.7554/eLife.43736)
Supplement: Figure 2—figure supplement 3—source data 1. [file elife-43736-fig2-figsupp3-data1.xlsx]

## Sheet: Sheet1
Fig. 2 - figure supplement 3A - Hair cells per neuromast in sfrp1a:nlsEos fish vs nontransgenic siblings					Fig. 2 - figure supplement 3B - Hair cells per neuromast in tnfsf10l3:nlsEos fish vs nontransgenic siblings					Fig. 2 - figure supplement 3C - Hair cells per neuromast in sost:nlsEos fish vs nontransgenic siblings
5 dpf		Regeneration			5 dpf		Regeneration			5 dpf		Regeneration
Sib	nlsEos	Sib	nlsEos		Sib	nlsEos	Sib	nlsEos		Sib	nlsEos	Sib	nlsEos
13	12	8	7		14	13	10	9		11	13	5	8
15	18	6	8		13	15	7	10		11	12	10	11
13	15	7	10		13	12	10	9		13	12	8	9
14	10	6	8		13	15	9	10		13	13	8	8
14	14	4	8		12	15	6	8		15	11	9	11
13	14	9	8		14	12	9	7		15	12	8	8
14	12	6	10		15	15	11	10		13	13	11	9
14	14	8	11		12	9	8	10		10	13	9	8
12	12	8	8		14	15	9	8		12	13	8	10
15	14	10	9		11	12	10	11		15	15	8	10
15	13	8	7		14	14	11	11		13	10	8	8
16	13	6	6		13	15	10	8		10	12	9	8
14	14	7	6		11	14	9	8		11	13	11	7
15	16	6	7		13	10	10	9		11	12	9	8
12	10	6	7		15	15	11	8		14	11	10	9
12	11	8	7		12	10	9	9		14	13	8	10
14	13	9	9		13	10	9	10		8	12	10	10
11	11	5	4		14	14	10	7		12	16	11	7
13	12	6	5		17	7	9	8		14	10	10	9
12	11	5	8		11	12	6	10		12	10	9	8
9	13	6	7		12	12	6	8		12	13	9	5
12	10	5	6		12	14	10	8		14	11	9	8
15	12	7	7		10	14	10	6		14	11	6	9
12	11	7	8		13	11	8	9		13	14	8	10
13	13	6	7		11	11	9	7		13	13	9	8
