# Supplementary material for: Distinct progenitor populations mediate regeneration in the zebrafish lateral line
Source: eLife. 2019 Mar 5;8:e43736. doi: 10.7554/eLife.43736 (PMC6433462; doi:10.7554/eLife.43736)
Supplement: Figure 2—source data 1. [file elife-43736-fig2-data1.xlsx]

## Sheet: Sheet1
Fig. 2B - peripheral Eos+ hair cells per neuromast (%)						Fig. 2D - AP Eos+ hair cells per neuromast (%)					Fig. 2F - DV Eos+ hair cells per neuromast (%)
5 dpf	8 dpf					5 dpf	8 dpf				5 dpf	8 dpf
0	14.2857					0	0				40	40
0	26.6667					15.3846	0				31.5789	69.2308
0	0					0	14.2857				44.4444	62.5
0	11.7647					13.3333	13.3333				56.25	87.5
0	0					0	0				57.1429	56.25
0	0					0	0				42.8571	61.5385
0	50					7.69231	30.7692				42.8571	57.1429
0	12.5					16.6667	12.5				31.25	37.5
0	0					0	0				40	75
0	0					0	0				42.8571	50
0	100					0	9.09091				57.1429	38.8889
12.5	0					28.5714	0				50	64.2857
11.7647	15.3846					0	0				25	46.6667
0	21.4286					14.2857	13.3333				43.75	61.5385
14.2857	21.4286					30	0				35.2941	66.6667
0	0					0	0				28.5714	47.0588
0	18.75					0	0				43.75	60
25	13.3333					16.6667	26.6667				53.3333	42.8571
23.5294	33.3333					0	28.5714				37.5	58.8235
12.5	7.14286					0	22.2222				50	53.8462
0	25					9.09091	0				18.75	55.5556
0	7.14286					0	30.7692				40	53.3333
40	43.75					0	7.14286				29.4118	53.3333
0	0					15.3846	15.3846				35.7143	53.3333
45.4545	6.66667					0	0				55.5556	57.1429
0	43.75					14.2857	0				61.5385	76.9231
64.2857	25					0	0				57.1429	82.3529
46.6667	14.2857					15.3846	0				57.1429	33.3333
0	6.66667					11.1111	0				37.5	55.5556
25	6.66667					0	0				53.3333	42.8571
13.3333	0					0	0				42.8571	71.4286
0	25					0	0				50	71.4286
37.5	66.6667					0	15.3846				42.8571	46.1538
28.5714	20					0	0				25	57.1429
38.4615	6.66667					8.33333	16.6667				15.3846	28.5714
26.6667	14.2857					18.1818	15.3846				33.3333	64.2857
42.8571	0					6.66667	0				31.25	56.25
30.7692	15.3846					0	0				46.1538	50
42.8571	0					0	0				21.4286	33.3333
33.3333	23.5294					0	0				46.1538	46.1538
50	27.2727					0	15.3846				57.1429	28.5714
14.2857	25					0	0				13.3333	40
14.2857	38.4615					14.2857	0				16.6667	45.4545
38.4615	25					0	0				25	42.8571
63.6364	14.2857					16.6667	0				38.4615	75
28.5714	26.6667					0	20				0	50
46.1538	20					0	0				40	64.2857
38.4615	54.5455					0	0				28.5714	76.9231
42.8571	14.2857					0	0				33.3333	60
0	30.7692					13.3333	11.1111				40	80
