# Supplementary material for: Distinct progenitor populations mediate regeneration in the zebrafish lateral line
Source: eLife. 2019 Mar 5;8:e43736. doi: 10.7554/eLife.43736 (PMC6433462; doi:10.7554/eLife.43736)
Supplement: Figure 3—source data 1. [file elife-43736-fig3-data1.xlsx]

## Sheet: Sheet1
Fig. 3E - Eos+ hair cells per neuromast following regeneration (%)						Fig. 3F - Eos+ support cells per neuromast prior to hair cell death
Peripheral	AP	DV				Peripheral	AP	DV
0	20	55.5556				10	20	22
0	0	55.5556				11	24	23
0	50	75				11	25	22
0	18.1818	75				12	26	23
0	0	80				8	21	28
0	40	60				14	24	24
0	50	61.5385				15	25	28
0	33.3333	50				15	21	19
0	66.6667	40				7	27	23
0	66.6667	75				12	24	24
0	36.3636	50				6	33	21
0	0	66.6667				11	20	25
0	9.09091	80				11	24	25
0	13.3333	66.6667				13	33	30
0	0	60				14	18	27
33.3333	30.7692	53.8462				22	28	26
0	0	50				11	24	33
0	0	75				13	21	23
0	0	40				17	22	29
0	41.6667	40				13	24	27
0	16.6667	55.5556				9	20	23
8.33333	33.3333	81.8182				16	27	27
0	60	50				22	25	22
0	18.1818	66.6667				22	28	21
0	0	100				15	21	37
0	0	63.6364				13	18	25
20	22.2222	60				20	25	29
10	0	50				20	17	24
0	50	60				17	27	31
0	0	75				17	16	28
0	12.5	50				10	26	19
0	33.3333	60				18	20	22
0	36.3636	60				15	26	23
0	0	50				19	20	21
0	0	50				8	19	18
0	0	50				15	15	21
40	14.2857	60				23	23	30
0	0	75				13	21	17
0	40	60				12	28	25
0	25	75				16	26	27
0	28.5714	50				7	17	20
0	0	50				14	12	16
0	55.5556	50				15	31	18
0	37.5	50				12	25	22
14.2857	22.2222	57.1429				14	20	14
11.1111	10	75				15	20	20
22.2222	22.2222	66.6667				19	20	26
0	0	60				16	25	23
0	0	66.6667				19	18	19
20	0	55.5556				18	20	23
