# Supplementary material for: Distinct progenitor populations mediate regeneration in the zebrafish lateral line
Source: eLife. 2019 Mar 5;8:e43736. doi: 10.7554/eLife.43736 (PMC6433462; doi:10.7554/eLife.43736)
Supplement: Figure 4—source data 1. [file elife-43736-fig4-data1.xlsx]

## Sheet: Sheet1
Fig. 4B - Hair cells per neuromast (peripheral)					Fig. 4C - Peripheral Eos+ hair cells per neuromast					Fig. 4D - Peripheral Eos+ hair cells per neuromast (%)						Fig. 4F - Hair cells per neuromast (AP)				Fig. 4G - AP Eos+ hair cells per neuromast					Fig. 4H - AP Eos+ hair cells per neuromast (%)					Fig. 4J - Hair cells per neuromast (DV)				Fig. 4K - DV Eos+ hair cells per neuromast					Fig. 4L - DV Eos+ hair cells per neuromast (%)
Neo	Neo/LY				Neo	Neo/LY				Neo	Neo/LY					Neo	Neo/LY			Neo	Neo/LY				Neo	Neo/LY				Neo	Neo/LY			Neo	Neo/LY				Neo	Neo/LY
11	23				0	0				0	0					11	23			0	11				0	47.8261				13	39			11	28				84.6154	71.7949
7	17				0	0				0	0					10	25			4	19				40	76				12	31			8	16				66.6667	51.6129
9	18				2	0				22.2222	0					8	24			6	10				75	41.6667				14	29			12	16				85.7143	55.1724
12	20				0	0				0	0					8	27			0	10				0	37.037				9	31			7	15				77.7778	48.3871
12	12				0	0				0	0					9	27			0	2				0	7.40741				12	30			6	20				50	66.6667
11	16				0	0				0	0					10	29			4	12				40	41.3793				8	37			2	32				25	86.4865
12	12				0	0				0	0					8	21			0	11				0	52.3809				12	29			8	14				66.6667	48.2759
14	22				0	0				0	0					12	25			3	16				25	64				10	32			4	16				40	50
13	29				0	2				0	6.89655					8	21			0	17				0	80.9524				13	29			10	21				76.9231	72.4138
12	24				0	0				0	0					9	25			2	16				22.2222	64				12	25			8	16				66.6667	64
11	33				0	2				0	6.06061					10	32			3	12				30	37.5				12	25			7	13				58.3333	52
6	18				0	0				0	0					12	29			6	9				50	31.0345				12	35			10	17				83.3333	48.5714
12	24				0	3				0	12.5					8	24			4	12				50	50				16	37			12	26				75	70.2703
12	27				0	0				0	0					8	22			0	11				0	50				13	27			9	12				69.2308	44.4444
11	7				0	0				0	0					10	29			2	12				20	41.3793				14	33			11	20				78.5714	60.6061
10	8				0	0				0	0					9	23			1	14				11.1111	60.8696				14	32			10	25				71.4286	78.125
10	20				0	0				0	0					10	23			6	15				60	65.2174				12	20			8	9				66.6667	45
12	26				0	5				0	19.2308					11	28			1	11				9.09091	39.2857				12	29			9	18				75	62.069
10	14				0	1				0	7.14286					11	32			3	18				27.2727	56.25				13	28			8	12				61.5385	42.8571
11	26				0	0				0	0					6	31			4	17				66.6667	54.8387				13	25			5	18				38.4615	72
11	23				0	0				0	0					8	24			0	15				0	62.5				9	34			6	19				66.6667	55.8824
9	24				0	0				0	0					11	24			2	11				18.1818	45.8333				10	17			6	4				60	23.5294
8	21				0	7				0	33.3333					8	28			0	15				0	53.5714				12	32			10	14				83.3333	43.75
12	15				1	0				8.33333	0					10	12			2	4				20	33.3333				11	38			7	24				63.6364	63.1579
10	9				0	0				0	0					8	18			2	18				25	100				11	36			7	24				63.6364	66.6667
9	20				0	0				0	0					11	26			0	11				0	42.3077				11	25			8	12				72.7273	48
8	15				2	0				25	0					9	21			1	11				11.1111	52.3809				10	25			6	17				60	68
13	30				0	1				0	3.33333					10	21			4	5				40	23.8095				10	29			5	14				50	48.2759
9	13				0	1				0	7.69231					10	20			1	15				10	75				9	26			7	16				77.7778	61.5385
12	18				2	1				16.6667	5.55556					8	29			4	8				50	27.5862				9	27			7	15				77.7778	55.5556
10	24				0	4				0	16.6667					8	18			2	13				25	72.2222				12	12			8	6				66.6667	50
8	9				0	0				0	0					10	19			6	9				60	47.3684				10	20			9	6				90	30
12	22				0	6				0	27.2727					8	10			3	9				37.5	90				8	24			6	12				75	50
11	13				0	0				0	0					8	14			0	10				0	71.4286				10	31			7	19				70	61.2903
13	12				4	1				30.7692	8.33333					6	20			1	6				16.6667	30				13	18			7	3				53.8462	16.6667
10	16				0	0				0	0					12	23			3	12				25	52.1739				16	16			8	8				50	50
11	8				2	0				18.1818	0					7	20			0	9				0	45				10	21			8	13				80	61.9048
9	27				0	8				0	29.6296					7	13			1	2				14.2857	15.3846				9	29			5	16				55.5556	55.1724
9	25				2	3				22.2222	12					8	24			2	12				25	50				10	28			6	12				60	42.8571
12	23				2	0				16.6667	0					6	13			0	5				0	38.4615				9	22			5	10				55.5556	45.4545
7	15				0	0				0	0					10				2					20					10	14			5	3				50	21.4286
8	30				0	0				0	0					10				6					60					8	30			8	15				100	50
8	15				6	0				75	0					9				6					66.6667					10	35			6	22				60	62.8571
12	12				0	0				0	0					6				2					33.3333					6	30			5	19				83.3333	63.3333
9	29				3	7				33.3333	24.1379					4				2					50					12	10			6	7				50	70
12	13				3	1				25	7.69231					10				2					20					12	19			10	12				83.3333	63.1579
9					2					22.2222						9				0					0					8	19			6	9				75	47.3684
7					0					0						8				4					50					12	29			10	17				83.3333	58.6207
8					0					0						9				2					22.2222					8				6					75
10					0					0						6				2					33.3333					6				5					83.3333
