# Supplementary material for: Distinct progenitor populations mediate regeneration in the zebrafish lateral line
Source: eLife. 2019 Mar 5;8:e43736. doi: 10.7554/eLife.43736 (PMC6433462; doi:10.7554/eLife.43736)
Supplement: Figure 5—source data 1. [file elife-43736-fig5-data1.xlsx]

## Sheet: Sheet1
Fig. 5C - DV support cells per neuromast 3 vs 5 dpf					Fig. 5G - DV Eos+ support cells per neuromast after different Mtz treatments
NTR-GFP/nlsEos 3 dpf	NTR-GFP/nlsEos 5 dpf	nlsEos only 3 dpf	nlsEos only 5 dpf		Mock	Mtz5	Mtz3/5
6	10	7	10		11	12	8
10	8	9	12		12	12	10
7	8	6	11		14	10	5
9	6	8	10		13	10	8
12	12	8	6		13	12	7
11	7	11	17		13	9	6
9	10	6	12		10	11	9
13	12	10	9		16	8	7
10	11	8	8		9	9	8
10	7	9	9		10	12	6
11	6	7	16		16	13	8
7	9	5	13		11	12	8
11	10	7	16		9	7	9
7	5	7	13		12	9	8
11	11	8	10		15	10	5
7	9	6	11		13	13	10
8	14	5	15		11	10	5
12	14	5	15		9	9	11
11	12	6	12		13	12	8
13	9	8	15		12	11	9
9	8	7	9		14	12	8
6	10	6	14		11	9	6
6	9	5	12		9	10	6
8	7	9	13		11	10	8
13	12	8	11		11	6	4
11	7	5	13		11	9	7
7	8	7	12		10	9	7
8	7	7	10		8	12	6
9	7	6	14		11	8	8
9	8	8	6		11	10	9
6	6	8	11		11	9	5
8	10	5	9		13	7	7
6	8	5	9		13	9	5
13	7	4	10		11	10	6
9	7	4	10		10	9	7
14	7	3	11		11	12	12
8	10	7	10		14	9	3
9	6	6	9		8	11	5
11	9	2	10		9	13	4
10	6	4	7		8	5	5
4	10	4	8		9	10	8
6	8	4	7		12	5	9
6	6	0	14		12	8	5
5	8	6	6		9	9	5
10	7	2	9		8	7	5
9	5	5	11		12	8	3
11	8	3	9		8	10	3
8	10	3	9		11	7	4
9	4	10	9		10	9	4
					11	13	9
