# Supplementary material for: Distinct progenitor populations mediate regeneration in the zebrafish lateral line
Source: eLife. 2019 Mar 5;8:e43736. doi: 10.7554/eLife.43736 (PMC6433462; doi:10.7554/eLife.43736)
Supplement: Figure 6—figure supplement 1—source data 1. [file elife-43736-fig6-figsupp1-data1.xlsx]

## Sheet: Sheet1
Fig. 6 - figure supplement 1 - hair cell regeneration mtz no ntr
Neo	Mtz3/Neo/Mtz5
12	10
7	12
10	9
9	10
10	10
10	10
11	10
8	10
6	9
10	9
8	12
12	14
9	11
7	9
7	9
8	9
10	11
10	10
9	10
12	8
9	10
12	9
11	9
10	7
8	9
6	10
11	11
11	11
10	10
10	13
8	7
10	11
9	10
9	10
9	10
11	7
9	11
10	13
10	10
11	9
9
12
10
10
9
8
10
10
10
8
