# Supplementary material for: Distinct progenitor populations mediate regeneration in the zebrafish lateral line
Source: eLife. 2019 Mar 5;8:e43736. doi: 10.7554/eLife.43736 (PMC6433462; doi:10.7554/eLife.43736)
Supplement: Figure 6—figure supplement 2—source data 1. [file elife-43736-fig6-figsupp2-data1.xlsx]

## Sheet: Sheet1
Fig. 6 - figure supplement 2 - Hair cells per neuromast in sost:NTR/nlsEos vs sost:NTR vs sost:nlsEos fish vs non-transgenic siblings
5 dpf					Regeneration
Sib	NTR-GFP	nlsEos	NTR-GFP/nlsEos		Sib	NTR-GFP	nlsEos	NTR-GFP/nlsEos
12	15	12	15		10	7	9	10
13	17	12	14		9	13	8	10
12	14	13	10		8	8	8	8
16	13	14	15		8	8	8	11
12	10	14	13		8	10	8	8
13	14	15	18		13	9	7	8
15	15	12	12		9	10	9	10
14	15	14	14		7	9	6	10
15	13	14	13		10	9	8	9
12	14	15	13		11	9	8	7
14	12	12	16		10	8	7	9
14	13	14	12		7	11	7	6
14	14	12	15		9	8	8	8
14	17	13	11		9	8	9	9
14	14	14	14		10	7	9	7
12	15	11	15		8	6	7	8
11	19	13	16		10	11	8	9
13	14	11	10		8	6	8	10
12	12	11	14		5	7	8	8
14	13	13	13		10	8	8	8
11	13	12	14		8	7	9	9
11	13	14	11		8	8	9	7
14	10	13	11		9	8	6	7
11	11	15	12		8	7	9	9
12	9	12	13		6	6	9	8
