# Supplementary material for: Distinct progenitor populations mediate regeneration in the zebrafish lateral line
Source: eLife. 2019 Mar 5;8:e43736. doi: 10.7554/eLife.43736 (PMC6433462; doi:10.7554/eLife.43736)
Supplement: Figure 6—source data 1. [file elife-43736-fig6-data1.xlsx]

## Sheet: Sheet1
Fig. 6E - Hair cells per neuromast				Fig. 6F - Eos+ hair cells per neuromast				Fig. 6G - Eos+ hair cells per neuromast (%)
Neo	Neo/Mtz5	Mtz3/Neo/Mtz5		Neo	Neo/Mtz5	Mtz3/Neo/Mtz5		Neo	Neo/Mtz5	Mtz3/Neo/Mtz5
14	11	4		9	7	0		64.2857	63.6364	0
13	15	6		9	11	0		69.2308	73.3333	0
15	10	6		8	5	0		53.3333	50	0
13	10	6		7	5	2		53.8462	50	33.3333
9	9	10		7	3	2		77.7778	33.3333	20
12	10	7		8	6	0		66.6667	60	0
12	10	6		8	5	2		66.6667	50	33.3333
14	10	6		12	5	0		85.7143	50	0
10	8	7		5	5	0		50	62.5	0
9	12	6		3	8	0		33.3333	66.6667	0
15	12	9		12	6	2		80	50	22.2222
14	12	10		8	6	3		57.1429	50	30
14	9	8		9	4	2		64.2857	44.4444	25
12	9	10		7	3	4		58.3333	33.3333	40
11	8	5		8	5	0		72.7273	62.5	0
11	8	9		8	4	2		72.7273	50	22.2222
11	7	7		6	5	0		54.5455	71.4286	0
13	10	8		13	8	3		100	80	37.5
10	9	6		7	6	0		70	66.6667	0
14	12	11		9	6	0		64.2857	50	0
14	10	7		10	4	0		71.4286	40	0
15	8	10		11	5	1		73.3333	62.5	10
13	8	6		8	3	0		61.5385	37.5	0
11	7	5		8	2	1		72.7273	28.5714	20
11	12	10		7	6	3		63.6364	50	30
11	9	10		9	3	0		81.8182	33.3333	0
9	9	7		6	7	0		66.6667	77.7778	0
9	10	11		7	6	3		77.7778	60	27.2727
8	9	7		4	7	0		50	77.7778	0
12	9	7		7	5	2		58.3333	55.5556	28.5714
15	6	8		12	0	0		80	0	0
12	8	9		8	4	0		66.6667	50	0
14	10	6		7	4	1		50	40	16.6667
9	7	7		6	2	4		66.6667	28.5714	57.1429
11	11	8		7	3	4		63.6364	27.2727	50
10	9	7		6	6	0		60	66.6667	0
10	6	8		2	2	0		20	33.3333	0
12	7	10		8	3	4		66.6667	42.8571	40
8	8	9		6	6	1		75	75	11.1111
14		9		8		3		57.1429		33.3333
15		8		11		0		73.3333		0
10		7		6		1		60		14.2857
14		4		12		0		85.7143		0
10		7		5		0		50		0
12		7		6		2		50		28.5714
9		5		9		0		100		0
9		8		4		1		44.4444		12.5
10		7		8		0		80		0
12		7		10		5		83.3333		71.4286
		8				0				0
