# Supplementary material for: Distinct progenitor populations mediate regeneration in the zebrafish lateral line
Source: eLife. 2019 Mar 5;8:e43736. doi: 10.7554/eLife.43736 (PMC6433462; doi:10.7554/eLife.43736)
Supplement: Figure 7—source data 1. [file elife-43736-fig7-data1.xlsx]

## Sheet: Sheet1
Fig. 7F - Hair cells per neuromast
Neo	Neo/LY	Mtz3/Neo/Mtz5	Mtz3/Neo/Mtz5/LY
10	21	5	10
8	23	5	14
3	16	9	13
12	18	7	19
9	24	8	8
9	28	6	20
8	28	10	13
11	19	10	18
7	15	9	19
9	20	7	13
9	25	5	19
11	28	6	14
7	28	6	11
8	22	5	16
8	19	6	18
8	23	6	15
13	24	7	20
10	22	9	10
9	18	5	9
6	17	4	17
10	25	8	14
12	26	6	11
8	25	5	14
10	21	7	10
10	18	5	10
11	14	10	21
11	15	10	20
11	13	6	15
11	18	7	13
8	22	6	12
12	22	4	10
10	16	3	15
12	18	6	16
9	20	7	11
10	19	6	11
9	30	7	16
13	20	8	17
12	19	9	16
10	21	7	17
9	20	6	18
9	16	9	19
10	21	8	22
10	24	7	17
8	21	6	16
10	22	4	14
8	30	8	18
9	27	9	17
8	23	8	16
8	19	9	13
8	11	7	18
