# Supplementary material for: Distinct progenitor populations mediate regeneration in the zebrafish lateral line
Source: eLife. 2019 Mar 5;8:e43736. doi: 10.7554/eLife.43736 (PMC6433462; doi:10.7554/eLife.43736)
Supplement: Figure 8—source data 1. [file elife-43736-fig8-data1.xlsx]

## Sheet: Sheet1
Fig. 8D - Eos+ hair cells per neuromast					Fig. 8E - Eos+ hair cells per neuromast (%)
AP	DV	AP+DV			AP	DV	AP+DV
1	4	6			11.1111	44.4444	66.6667
3	5	12			30	45.4545	100
0	10	8			0	90.9091	100
0	10	6			0	90.9091	66.6667
2	6	9			20	75	100
2	6	10			25	60	100
0	8	6			0	80	75
1	5	6			10	62.5	66.6667
1	6	11			11.1111	66.6667	100
2	6	9			22.2222	60	81.8182
2	6	5			18.1818	50	55.5556
2	4	11			22.2222	50	100
7	10	8			63.6364	83.3333	88.8889
4	6	7			57.1429	50	87.5
1	8	10			9.09091	80	100
4	6	7			50	54.5455	77.7778
7	4	13			63.6364	44.4444	100
1	10	5			12.5	76.9231	71.4286
2	10	8			20	90.9091	80
0	6	9			0	54.5455	75
0	8	7			0	66.6667	87.5
2	5	9			13.3333	62.5	81.8182
2	9	10			25	69.2308	83.3333
2	6	7			22.2222	75	87.5
2	8	8			18.1818	72.7273	88.8889
4	7	9			40	63.6364	81.8182
5	6	8			71.4286	60	100
2	6	6			25	75	100
0	9	10			0	90	83.3333
5	6	11			50	60	100
0	6	5			0	75	71.4286
6	4	7			60	66.6667	77.7778
2	6	7			25	60	63.6364
2	8	8			22.2222	88.8889	88.8889
4	3	8			40	33.3333	72.7273
3	6	8			50	54.5455	100
4	8	4			50	80	66.6667
1	7	6			12.5	77.7778	100
1	4	8			16.6667	50	80
3	6	11			42.8571	60	100
1	4	7			11.1111	57.1429	100
4	8	10			50	72.7273	100
3	6	8			42.8571	66.6667	80
2	5	10			40	71.4286	100
1	6	11			12.5	60	100
2	4	8			28.5714	57.1429	100
6	4	10			50	50	100
1	6	7			12.5	66.6667	100
4	4	9			44.4444	50	100
4	6	9			57.1429	54.5455	90
