# Supplementary material for: Distinct progenitor populations mediate regeneration in the zebrafish lateral line
Source: eLife. 2019 Mar 5;8:e43736. doi: 10.7554/eLife.43736 (PMC6433462; doi:10.7554/eLife.43736)
Supplement: Figure 9—source data 1. [file elife-43736-fig9-data1.xlsx]

## Sheet: Sheet1
Fig. 9C - Hair cells per neuromast				Fig. 9D - Eos+ hair cells per neuromast				Fig. 9E - Eos+ hair cells per neuromast (%)
Neo	Mtz3/Neo/Mtz5			Neo	Mtz3/Neo/Mtz5			Neo	Mtz3/Neo/Mtz5
10	10			4	4			40	40
12	10			3	4			25	40
11	8			4	3			36.3636	37.5
9	10			2	4			22.2222	40
8	8			2	4			25	50
8	9			0	3			0	33.3333
11	8			5	3			45.4545	37.5
8	11			2	2			25	18.1818
11	6			4	4			36.3636	66.6667
9	9			5	2			55.5556	22.2222
10	12			5	4			50	33.3333
13	8			4	7			30.7692	87.5
10	5			1	3			10	60
10	8			4	3			40	37.5
11	8			6	3			54.5455	37.5
12	12			2	6			16.6667	50
13	9			4	4			30.7692	44.4444
13	10			0	6			0	60
12	9			3	3			25	33.3333
10	10			2	3			20	30
12	6			4	3			33.3333	50
8	7			2	2			25	28.5714
9	11			2	2			22.2222	18.1818
12	9			4	3			33.3333	33.3333
9	7			2	2			22.2222	28.5714
9	5			0	3			0	60
11	8			1	3			9.09091	37.5
9	7			4	4			44.4444	57.1429
9	8			5	3			55.5556	37.5
13	7			4	2			30.7692	28.5714
11	7			2	2			18.1818	28.5714
11	8			3	2			27.2727	25
11	10			2	2			18.1818	20
10	7			3	4			30	57.1429
10	6			3	6			30	100
10	5			2	2			20	40
9	7			2	0			22.2222	0
10	7			2	1			20	14.2857
13	9			10	4			76.9231	44.4444
10	6			2	3			20	50
10	7			4	7			40	100
8	7			0	1			0	14.2857
8	9			2	4			25	44.4444
12	7			4	3			33.3333	42.8571
8	7			0	2			0	28.5714
11	7			3	2			27.2727	28.5714
11	7			5	3			45.4545	42.8571
13	9			2	3			15.3846	33.3333
12	5			2	2			16.6667	40
8	7			1	2			12.5	28.5714
