# Supplementary material for: Distinct progenitor populations mediate regeneration in the zebrafish lateral line
Source: eLife. 2019 Mar 5;8:e43736. doi: 10.7554/eLife.43736 (PMC6433462; doi:10.7554/eLife.43736)
Supplement: Figure 10—source data 1. [file elife-43736-fig10-data1.xlsx]

## Sheet: Sheet1
Fig. 10C - NTR-GFP+ cells per neuromast					Fig. 10D - EdU+ NTR-GFP cells per neuromast (%)
Mock	Mtz				Mock	Mtz
6	8				16.6667	50
11	8				0	62.5
9	6				44.4444	33.3333
10	5				0	100
10	8				0	75
9	7				44.4444	28.5714
10	4				0	75
13	4				30.7692	100
11	7				9.09091	71.4286
11	7				27.2727	85.7143
8	6				12.5	66.6667
7	6				0	100
9	7				0	85.7143
11	8				0	87.5
8	6				12.5	66.6667
7	8				28.5714	87.5
9	6				22.2222	66.6667
9	7				66.6667	71.4286
12	5				16.6667	80
7	9				28.5714	77.7778
6	3				0	50
8	6				0	85.7143
10	3				30	60
8	4				0	66.6667
9	3				11.1111	42.8571
8	6				50	66.6667
10	0				0	0
10	0				0	0
8	4				25	100
9	1				0	14.2857
8	4				50	25
10	8				20	75
10	5				0	60
8	6				0	100
10	4				20	0
11	7				18.1818	85.7143
7	6				0	0
10	4				20	50
10	6				0	33.3333
9	5				0	20
9	3				0	0
6	9				0	77.7778
8	3				0	0
8	5				0	60
6	5				0	40
7	5				28.5714	100
7	5				0	0
10	2				0	100
10	5				50	40
10	8				40	50
