# Supplementary material for: Distinct progenitor populations mediate regeneration in the zebrafish lateral line
Source: eLife. 2019 Mar 5;8:e43736. doi: 10.7554/eLife.43736 (PMC6433462; doi:10.7554/eLife.43736)
Supplement: Figure 11—figure supplement 1—source data 1. [file elife-43736-fig11-figsupp1-data1.xlsx]

## Sheet: Sheet1
Fig. 11 - figure supplement 1A - Number of converted sost:nlsEos+ cells following sost-NTR ablation						Fig. 11 - figure supplement 1B - Number of converted sfrp1a:nlsEos+ cells following sost-NTR ablation						Fig. 11 - figure supplement 1C - Number of converted tnfsf10l3:nlsEos+ cells following sost-NTR ablation
Mock	Mtz					Mock	Mtz					Mock	Mtz
25	7					12	8					18	16
20	14					12	11					21	19
20	14					13	12					23	15
17	12					11	12					18	18
20	10					12	13					16	14
21	14					8	10					16	16
13	18					12	9					24	17
18	12					15	15					21	14
18	15					16	13					23	22
17	6					11	16					21	18
25	16					15	7					15	22
22	14					14	12					18	16
22	13					14	12					16	19
17	15					16	15					20	19
17	11					10	10					20	15
19	7					11	14					17	13
21	15					15	10					15	17
21	13					11	17					17	17
24	16					8	14					20	16
18	13					16	14					18	15
21	18					8	7					17	14
26	15					9	14					17	19
27	16					11	7					23	17
20	16					13	8					18	14
23	10					8	8					16	19
26	11					13	8					15	16
22	22					12	12					17	15
23	15					11	11					18	22
24	18					16	13					17	15
22	14					10	13					19	20
26	10					11	10					17	18
21	8					15	11					18	21
25	12					10	12					20	18
21	10					15	12					16	20
17	8					10	14					23	17
28	17					14	8					18	16
23	14					12	12					14	22
23	11					15	11					15	16
17	12					15	15					17	19
19	9					16	15					16	21
24	10					11	9					20	15
20	13					12	9					20	14
25	11					13	11					18	21
20	14					13	13					19	17
18	6					11	10					19	16
24	13					7	7					18	17
27	13					8	7					18	18
24	14					9	8					17	22
21	10					10	15					21	18
19	10					10	12					22	18
