# Supplementary material for: Distinct progenitor populations mediate regeneration in the zebrafish lateral line
Source: eLife. 2019 Mar 5;8:e43736. doi: 10.7554/eLife.43736 (PMC6433462; doi:10.7554/eLife.43736)
Supplement: Figure 11—figure supplement 2—source data 1. [file elife-43736-fig11-figsupp2-data1.xlsx]

## Sheet: Sheet1
Fig. 11 - figure supplement 2 - Number of sost:NTR+ cells per neuromast in different nlsEos lines
sost	sfrp1a	tnfsf10l3
12	9	8
8	9	8
8	10	8
7	9	7
8	9	8
6	6	8
8	8	9
8	7	10
8	9	8
11	10	6
8	6	7
6	7	9
5	7	8
6	8	7
7	7	9
6	7	7
9	8	6
7	5	8
8	6	7
7	6	10
9	9	5
8	7	6
8	8	9
7	6	5
5	4	9
8	8	8
7	9	6
6	4	6
8	7	5
10	8	9
6	9	6
5	9	9
7	9	6
8	6	5
7	5	5
8	8	3
5	7	4
8	7	7
6	6	9
6	6	8
5	7	7
5	4	8
7	4	6
9	6	4
5	4	7
5	5	6
6	4	4
6	3	8
6	6	5
5	2	5
