# Supplementary material for: Distinct progenitor populations mediate regeneration in the zebrafish lateral line
Source: eLife. 2019 Mar 5;8:e43736. doi: 10.7554/eLife.43736 (PMC6433462; doi:10.7554/eLife.43736)
Supplement: Figure 11—source data 1. [file elife-43736-fig11-data1.xlsx]

## Sheet: Sheet1
Fig. 11C - DV eos+ NTR-GFP cells per neuromast (%)						Fig. 11F- Peripheral eos+ NTR-GFP cells per neuromast (%)						Fig. 11I - AP eos+ NTR-GFP cells per neuromast (%)
Mock	Mtz					Mock	Mtz					Mock	Mtz
100	0					0	0					0	0
100	57.1429					0	0					12.5	16.6667
100	85.7143					0	20					0	14.2857
100	0					22.2222	66.6667					14.2857	0
100	40					0	25					12.5	0
100	80					0	20					25	0
100	80					12.5	28.5714					0	33.3333
75	50					14.2857	12.5					10	0
100	0					0	20					12.5	50
100	50					0	0					0	20
100	80					0	11.1111					14.2857	12.5
66.6667	57.1429					14.2857	25					33.3333	0
80	100					28.5714	20					0	0
100	80					0	37.5					14.2857	75
100	14.2857					0	60					22.2222	0
100	100					28.5714	0					0	12.5
88.8889	75					12.5	75					16.6667	40
100	40					0	57.1429					0	0
100	20					0	33.3333					0	22.2222
100	40					0	0					10	14.2857
100	80					0	25					0	28.5714
100	50					0	50					16.6667	0
100	20					12.5	28.5714					11.1111	28.5714
100	60					0	42.8571					20	33.3333
100	50					0	0					22.2222	0
100	100					0	25					0	28.5714
100	60					0	0					0	11.1111
100	66.6667					0	0					0	0
100	0					14.2857	66.6667					0	0
90	80					0	50					0	14.2857
100	25					0	40					16.6667	42.8571
100	66.6667					0	50					11.1111	28.5714
85.7143	80					11.1111	75					0	50
100	100					0	60					20	25
100	75					0	0					0	40
100	100					0	50					0	33.3333
100	0					0	50					0	0
100	33.3333					14.2857	50					0	28.5714
83.3333	50					0	60					0	37.5
100	0					0	33.3333					0	0
100	100					14.2857	0					0	0
100	33.3333					0	50					0	25
100	40					0	0					0	25
100	100					0	66.6667					0	12.5
100	100					25	0					0	60
100	100					0	33.3333					0	11.1111
100	60					0	50					25	14.2857
100	25					33.3333	66.6667					25	66.6667
100	0					0	0					0	0
100	100					50	28.5714					0	100
