# Supplementary material for: Distinct progenitor populations mediate regeneration in the zebrafish lateral line
Source: eLife journal article supplement (doi:10.7554/elife.43736), 2019-03-05
Supplement: figures [file elife-43736-figures-v2.pdf]

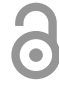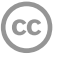

---

## Figures and figure supplements

Distinct progenitor populations mediate regeneration in the zebrafish lateral line

**Eric D Thomas and David W Raible**

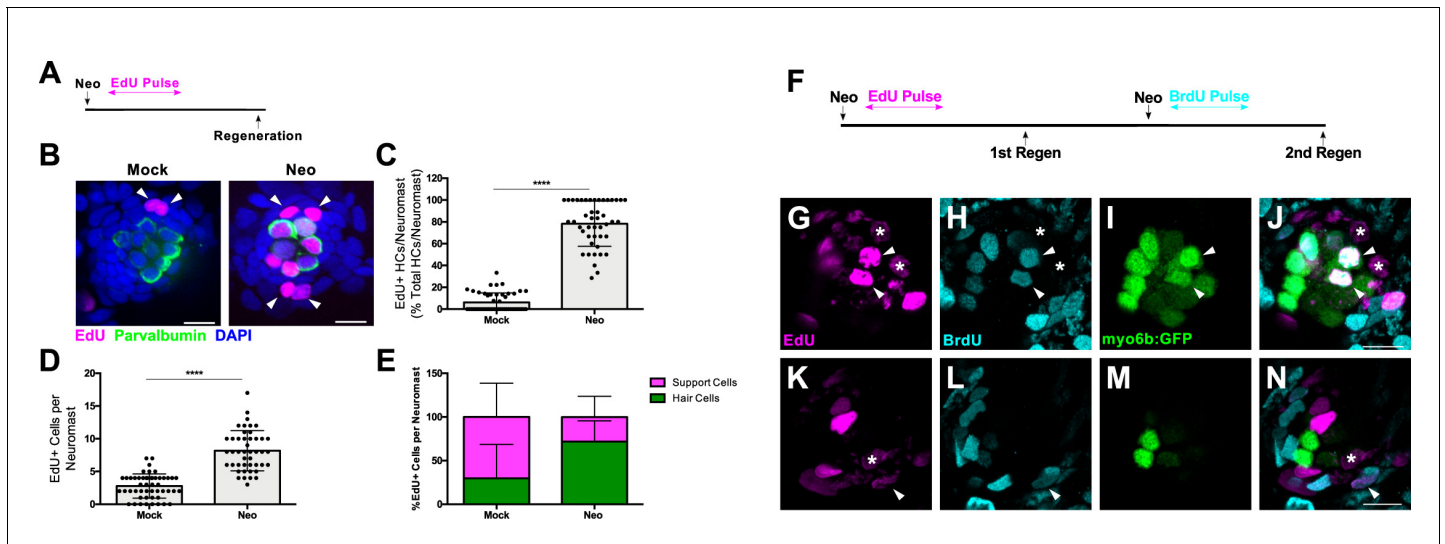

**Figure 1.** Hair cell progenitors are replenished via proliferation of other support cells. (A, F) Timelines of single-ablation (A) and double-ablation (F) proliferation experiments. (B) Maximum projections of mock- (Mock) and neomycin-treated (Neo) neuromasts. EdU-positive cells are shown in magenta, anti-Parvalbumin-stained hair cells are shown in green, and DAPI-stained nuclei are shown in blue. Arrowheads indicate EdU-positive support cells. Scale bar = 10  $\mu$ m. (C) Percentage of hair cells per neuromast labeled by EdU. Mock:  $6.11 \pm 8.69$ ,  $n = 50$  neuromasts (10 fish); Neo:  $78.24 \pm 20.69$ ,  $n = 45$  neuromasts (nine fish); mean  $\pm$  SD; Mann Whitney U test,  $p < 0.0001$ . (D) Total EdU-positive cells per neuromast. Mock:  $2.78 \pm 1.84$ ,  $n = 50$  neuromasts (10 fish); Neo:  $8.18 \pm 3.07$ ,  $n = 45$  neuromasts (nine fish); mean  $\pm$  SD; Mann Whitney U test,  $p < 0.0001$ . (E) Percentage of EdU-positive cells per neuromast that are either hair cells or support cells. Mock: 29.73% hair cells, 70.27% support cells,  $n = 50$  neuromasts (10 fish); Neo: 72.02% hair cells, 27.98% support cells,  $n = 45$  neuromasts (nine fish); mean  $\pm$  SD. (G–N) Individual slices of a neuromast following two regenerations at two different planes: apical hair cell layer (G–J) and basal support cell layer (K–N). EdU (visualized by a Click-iT reaction) is labeled in magenta, BrdU (anti-BrdU) is labeled in cyan, and myo6b:GFP hair cells are labeled in green. Arrowheads indicate EdU/BrdU-positive hair cells, and asterisks indicate EdU-positive support cells. Scale bar = 10  $\mu$ m.

DOI: <https://doi.org/10.7554/eLife.43736.003>

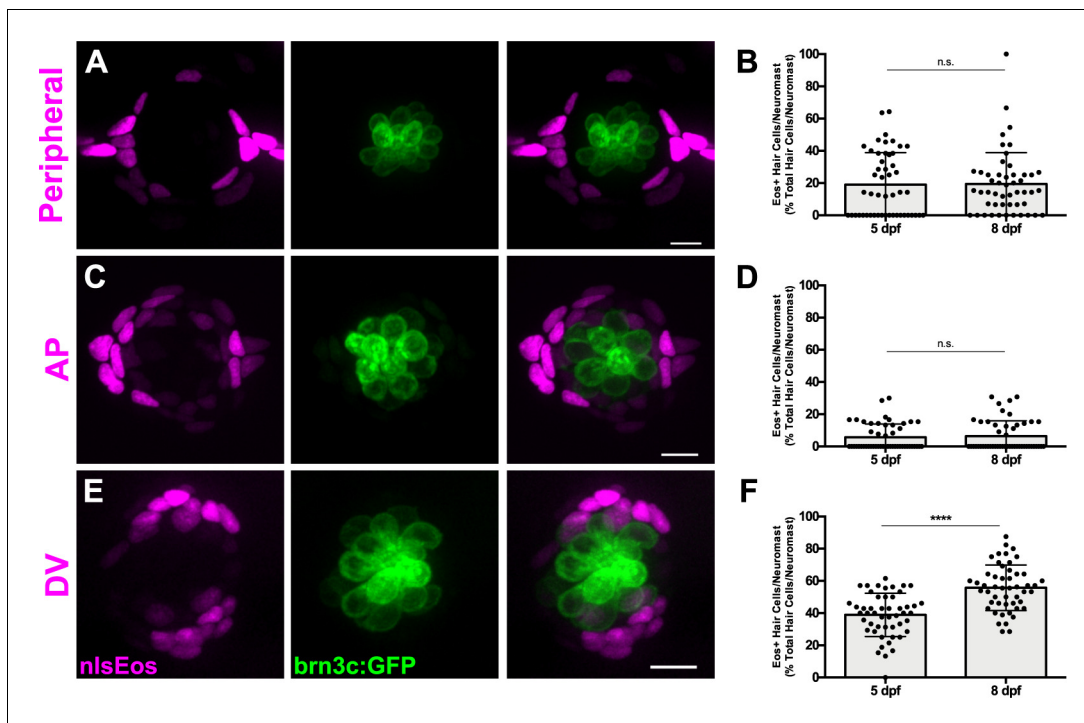

**Figure 2.** Genetic labeling of distinct support cell populations. (A, C, E) Maximum projections of neuromasts from *sfrp1a:nlsEos* (Peripheral, A), *tnfrsf10l3:nlsEos* (AP, C), and *sost:nlsEos* (DV, E) fish. Converted nlsEos-positive cells are shown in magenta, and brn3c:GFP-positive hair cells are shown in green. Scale bar = 10  $\mu$ m. (B, D, F) Percentage of hair cells per neuromast labeled by Peripheral (B), AP (D), and DV cells (F) at 5 and 8 dpf. (B) 5 dpf: 19.04  $\pm$  19.86, n = 50 neuromasts (10 fish); 8 dpf: 19.46  $\pm$  19.44, n = 50 neuromasts (10 fish); mean  $\pm$  SD; Mann Whitney U test, p=0.7047. (D) 5 dpf: 5.71  $\pm$  8.22, n = 50 neuromasts (10 fish); 8 dpf: 6.36  $\pm$  9.57, n = 50 neuromasts (10 fish); mean  $\pm$  SD; Mann Whitney U test, p=0.9668. (F) 5 dpf: 38.93  $\pm$  13.46, n = 50 neuromasts (10 fish); 8 dpf: 55.78  $\pm$  14.13, n = 50 neuromasts (10 fish); mean  $\pm$  SD; Mann Whitney U test, p<0.0001.

DOI: <https://doi.org/10.7554/eLife.43736.005>

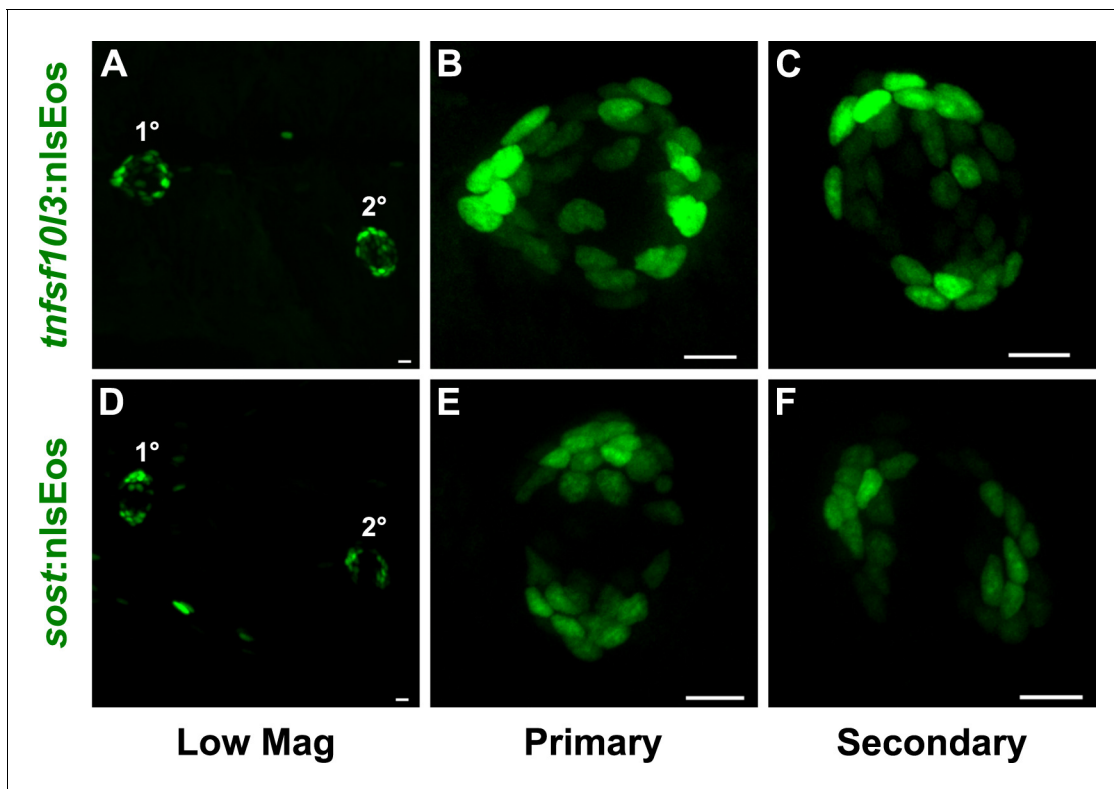

**Figure 2—figure supplement 1.** Asymmetry of support cell transgene expression in secondary neuromasts is orthogonal to primary neuromasts. (A–F) Maximum projections of lateral views of trunks (taken at 20x zoom) (A,D) or of individual neuromasts (B–C, E–F) from *tnfsf10l3:nlsEos* (A–C), and *sost:nlsEos* fish (D–F). Unconverted nlsEos-positive cells are shown in green. In Low Mag images (A,D), primary neuromasts are labeled with 1°, and secondary neuromasts are labeled with 2°. Scale bar = 10  $\mu$ m.

DOI: <https://doi.org/10.7554/eLife.43736.006>

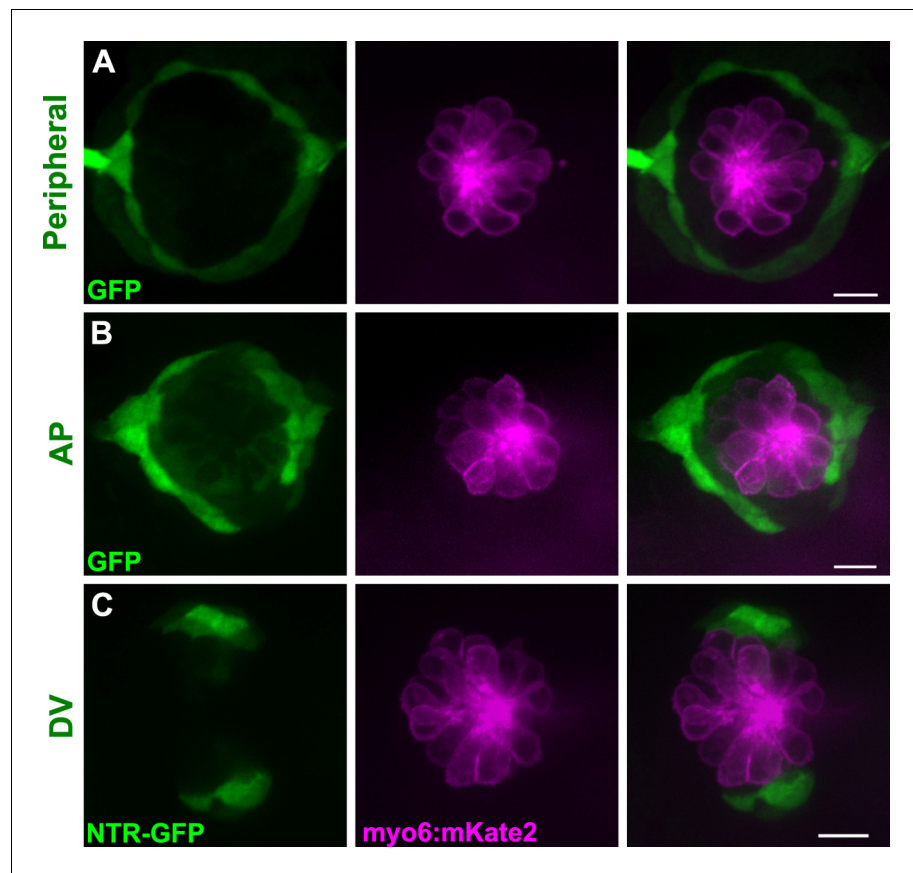

**Figure 2—figure supplement 2.** Support cell transgenes are not expressed in hair cells. (A–C) Maximum projections of neuromasts from *Tg[sfrp1a:GFP]<sup>w222</sup>* (Peripheral, A), *Tg[tnfrsf10l3:GFP]<sup>w223</sup>* (AP, B), and *sost:NTR-GFP* (DV, C) fish. GFP-positive cells are shown in green, and hair cells are shown in magenta via *myo6:mKate2*. In all three populations, there is no GFP expression in hair cells. Scale bar = 10  $\mu$ m.

DOI: <https://doi.org/10.7554/eLife.43736.007>

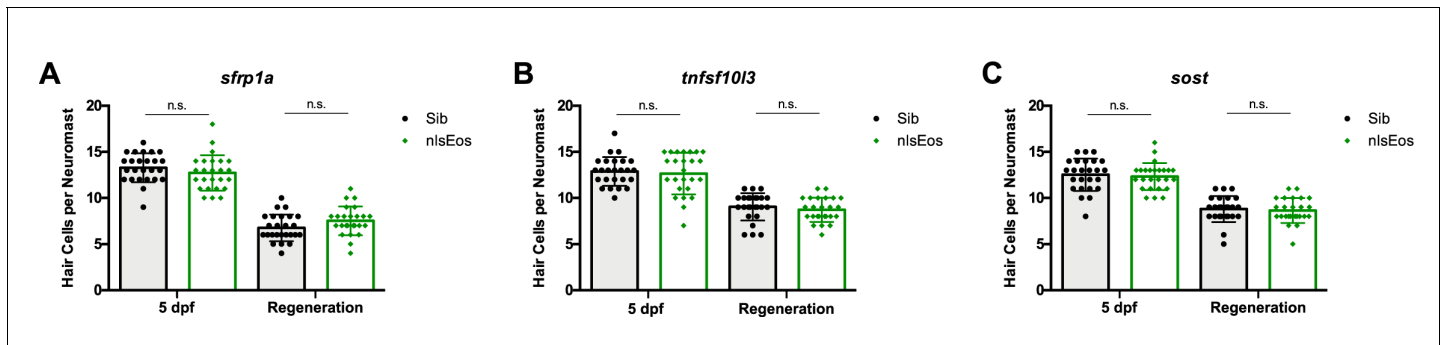

**Figure 2—figure supplement 3.** Expression of support cell transgenes does not alter hair cell development or regeneration. (A) Total number of FM 1-43FX-labeled hair cells per neuromast at 5 dpf or following hair cell regeneration (72 hpt) in *sfrp1a*:nlsEos fish (nlsEos) and non-transgenic siblings (Sib). 5 dpf:  $13.28 \pm 1.32$  (Sib) vs.  $12.72 \pm 1.93$  (nlsEos),  $n = 25$  neuromasts each (5 fish each); Regeneration:  $6.76 \pm 1.55$  (Sib) vs.  $7.52 \pm 1.56$  (nlsEos),  $n = 25$  neuromasts each (5 fish each); mean  $\pm$  SD; Mann Whitney U test,  $p=0.1414$  (5 dpf),  $p=0.0658$  (Regeneration). (B) Total number of FM 1-43FX-labeled hair cells per neuromast at 5 dpf or following hair cell regeneration (72 hpt) in *tnfrsf10l3*:nlsEos fish (nlsEos) and non-transgenic siblings (Sib). 5 dpf:  $12.88 \pm 1.56$  (Sib) vs.  $12.64 \pm 2.25$  (nlsEos),  $n = 25$  neuromasts each (five fish each); Regeneration:  $9.04 \pm 1.49$  (Sib) vs.  $8.72 \pm 1.31$  (nlsEos),  $n = 25$  neuromasts each (five fish each); mean  $\pm$  SD; Mann Whitney U test,  $p=0.9338$  (5 dpf),  $p=0.2722$  (Regeneration). (C) Total number of FM 1-43FX-labeled hair cells per neuromast at 5 dpf or following hair cell regeneration (72 hpt) in *sost*:nlsEos fish (nlsEos) and non-transgenic siblings (Sib). 5 dpf:  $12.52 \pm 1.76$  (Sib) vs.  $12.32 \pm 1.46$  (nlsEos),  $n = 25$  neuromasts each (five fish each); Regeneration:  $8.80 \pm 1.41$  (Sib) vs.  $8.64 \pm 1.35$  (nlsEos),  $n = 25$  neuromasts each (five fish each); mean  $\pm$  SD; Mann Whitney U test,  $p=0.4527$  (5 dpf),  $p=0.5396$  (Regeneration).

DOI: <https://doi.org/10.7554/eLife.43736.008>

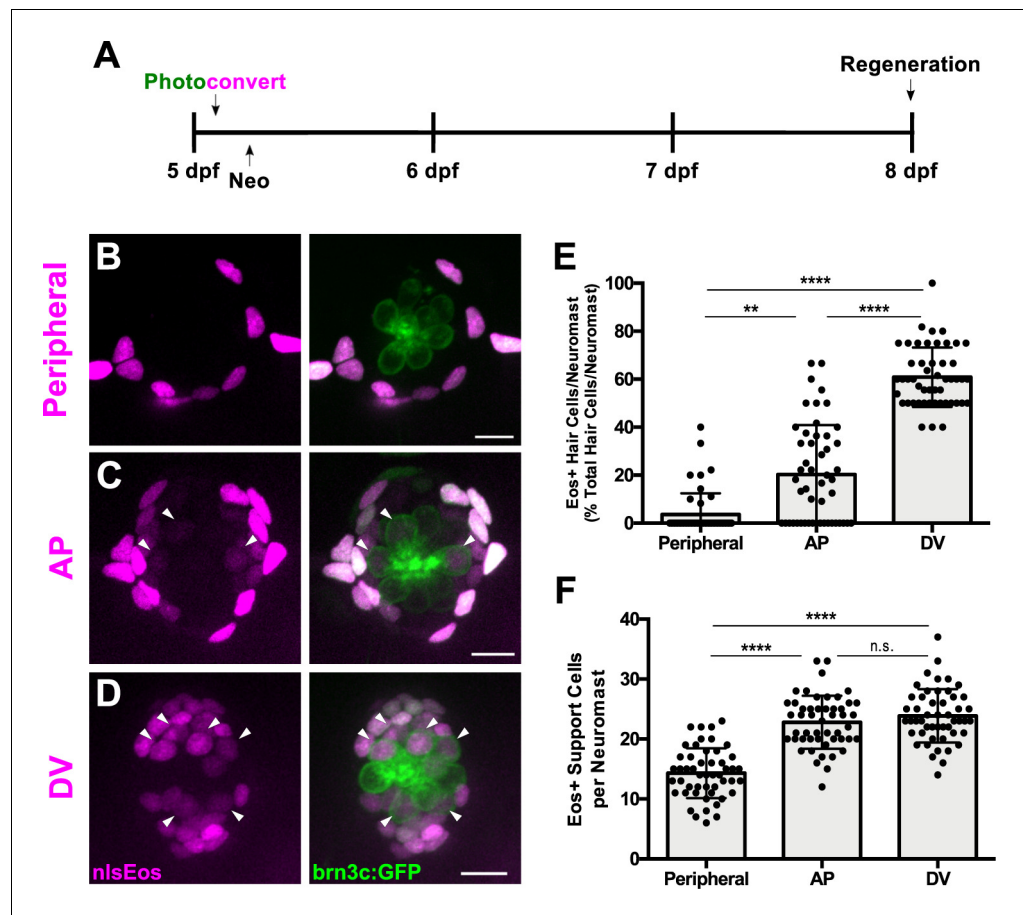

**Figure 3.** Distinct support cell populations have different regenerative capacities. (A) Timeline of nlsEos fate mapping experiment. Fish were photoconverted at 5 dpf, treated with neomycin, then fixed and imaged 72 hr post treatment (8 dpf). (B, C, D) Maximum projections of neuromasts from *sfrp1a*:nlsEos (Peripheral, B), *tnfrsf10l3*:nlsEos (AP, C), and *sost*:nlsEos (DV, D) fish following photoconversion and hair cell regeneration. Converted nlsEos-positive cells are shown in magenta, and *brn3c*:GFP-positive hair cells are shown in green. Arrowheads indicate nlsEos-positive hair cells. Scale bar = 10  $\mu$ m. (E) Percentage of hair cells per neuromast labeled by nlsEos following regeneration. *Sfrp1a*:nlsEos (Peripheral):  $3.59 \pm 8.87$ ,  $n = 50$  neuromasts (10 fish); *tnfrsf10l3*:nlsEos (AP):  $20.28 \pm 20.58$ ,  $n = 50$  neuromasts (10 fish); *sost*:nlsEos (DV):  $60.87 \pm 12.37$ ,  $n = 50$  neuromasts (10 fish); mean  $\pm$  SD; Kruskal-Wallis test, Dunn's post-test,  $p = 0.003$  (Peripheral vs. AP),  $p < 0.0001$  (Peripheral vs. DV, AP vs. DV). (F) Total nlsEos-positive support cells per neuromast prior to hair cell ablation. *Sfrp1a*:nlsEos (Peripheral):  $14.30 \pm 4.17$ ,  $n = 50$  neuromasts (10 fish); *tnfrsf10l3*:nlsEos (AP):  $22.8 \pm 4.40$ ,  $n = 50$  neuromasts (10 fish); *sost*:nlsEos (DV):  $23.86 \pm 4.45$ ,  $n = 50$  neuromasts (10 fish); mean  $\pm$  SD; Kruskal-Wallis test, Dunn's post-test,  $p < 0.0001$  (Peripheral vs. AP, Peripheral vs. DV),  $p > 0.9999$  (AP vs. DV).

DOI: <https://doi.org/10.7554/eLife.43736.011>



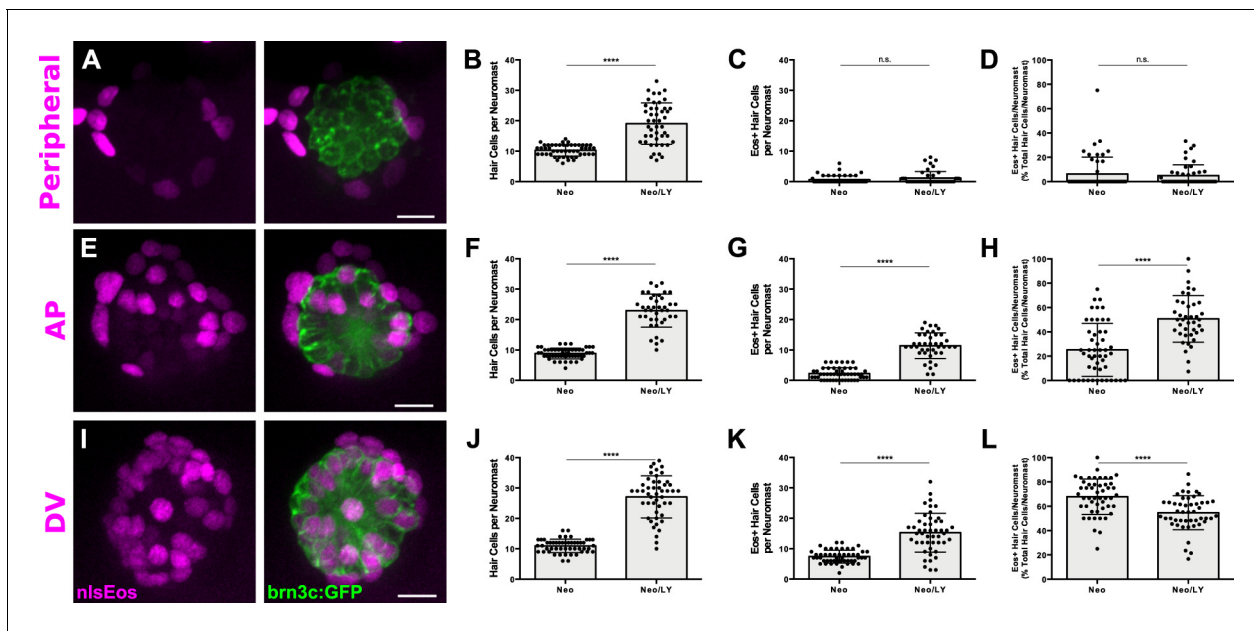

**Figure 4.** Notch signaling differentially regulates support cell populations. (A, E, I) Maximum projections of neuromasts expressing *sfrp1a:nlsEos* (Peripheral, A), *tnfsf10l3:nlsEos* (AP, E), and *sost:nlsEos* (DV, I) following Notch-inhibited hair cell regeneration. Converted *nlsEos*-positive cells are shown in magenta, and *brn3c:GFP*-positive hair cells are shown in green. Scale bar = 10  $\mu$ m. (B) Total number of hair cells per neuromast in *sfrp1a:nlsEos* fish following hair cell regeneration. Neo:  $10.28 \pm 1.88$ ,  $n = 50$  neuromasts (10 fish); Neo/LY:  $19.07 \pm 6.79$ ,  $n = 46$  neuromasts (10 fish); mean  $\pm$  SD; Mann Whitney U test,  $p < 0.0001$ . (C) *Sfrp1a:nlsEos*-positive hair cells per neuromast following hair cell regeneration. Neo:  $0.62 \pm 1.28$ ,  $n = 50$  neuromasts (10 fish); Neo/LY:  $1.15 \pm 2.16$ ,  $n = 46$  neuromasts (10 fish); mean  $\pm$  SD; Mann Whitney U test,  $p = 0.2481$ . (D) Percentage of *sfrp1a:nlsEos*-labeled hair cells per neuromast following hair cell regeneration. Neo:  $6.31 \pm 13.83$ ,  $n = 50$  neuromasts (10 fish); Neo/LY:  $4.95 \pm 8.82$ ,  $n = 46$  neuromasts (10 fish); mean  $\pm$  SD; Mann Whitney U test,  $p = 0.5148$ . (F) Total number of hair cells per neuromast in *tnfsf10l3:nlsEos* fish following hair cell regeneration. Neo:  $8.84 \pm 1.75$ ,  $n = 50$  neuromasts (10 fish); Neo/LY:  $22.93 \pm 5.45$ ,  $n = 40$  neuromasts (eight fish); mean  $\pm$  SD; Mann Whitney U test,  $p < 0.0001$ . (G) *Tnfsf10l3:nlsEos*-positive hair cells per neuromast following hair cell regeneration. Neo:  $2.22 \pm 1.94$ ,  $n = 50$  neuromasts (10 fish); Neo/LY:  $11.38 \pm 4.23$ ,  $n = 40$  neuromasts (eight fish); mean  $\pm$  SD; Mann Whitney U test,  $p < 0.0001$ . (H) Percentage of *tnfsf10l3:nlsEos*-labeled hair cells per neuromast following hair cell regeneration. Neo:  $25.19 \pm 21.72$ ,  $n = 50$  neuromasts (10 fish); Neo/LY:  $50.68 \pm 19.23$ ,  $n = 40$  neuromasts (eight fish); mean  $\pm$  SD; Mann Whitney U test,  $p < 0.0001$ . (J) Total number of hair cells per neuromast in *sost:nlsEos* fish following hair cell regeneration. Neo:  $10.94 \pm 2.23$ ,  $n = 50$  neuromasts (10 fish); Neo/LY:  $27.06 \pm 6.90$ ,  $n = 48$  neuromasts (10 fish); mean  $\pm$  SD; Mann Whitney U test,  $p < 0.0001$ . (K) *Sost:nlsEos*-positive hair cells per neuromast following hair cell regeneration. Neo:  $7.40 \pm 2.13$ ,  $n = 50$  neuromasts (10 fish); Neo/LY:  $15.25 \pm 6.36$ ,  $n = 48$  neuromasts (10 fish); mean  $\pm$  SD; Mann Whitney U test,  $p < 0.0001$ . (L) Percentage of *sost:nlsEos*-labeled hair cells per neuromast following hair cell regeneration. Neo:  $67.86 \pm 14.63$ ,  $n = 50$  neuromasts (10 fish); Neo/LY:  $54.69 \pm 14.01$ ,  $n = 48$  neuromasts (10 fish); mean  $\pm$  SD; Mann Whitney U test,  $p < 0.0001$ .

DOI: <https://doi.org/10.7554/eLife.43736.013>



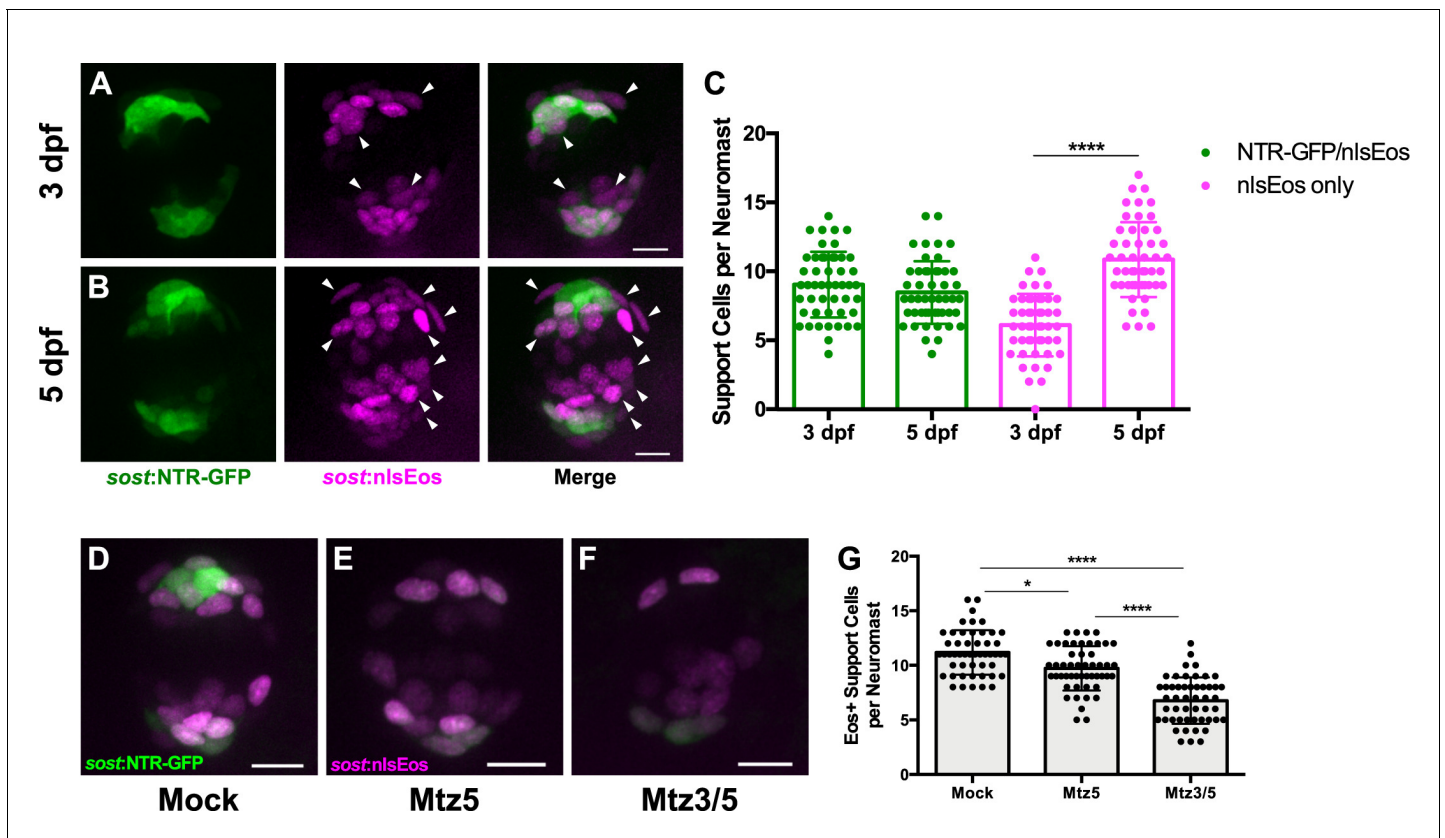

**Figure 5.** Differences in overlap between *sost:NTR-GFP* and *sost:nlsEos* populations. (A–B) Maximum projections of neuromasts from *sost:NTR-GFP*; *sost:nlsEos* fish at 3 dpf (A) and 5 dpf (B). *Sost:NTR-GFP* cells are shown in green and *sost:nlsEos* cells are shown in magenta. Arrowheads indicate cells expressing *sost:nlsEos* but not *sost:NTR-GFP*. Scale bar = 10  $\mu$ m. (C) Support cells per neuromast expressing either *NTR-GFP* and *nlsEos* (green) or *nlsEos* only (magenta) at 3 dpf and 5 dpf. *NTR-GFP/nlsEos*:  $9.04 \pm 2.39$  (3 dpf) vs.  $8.47 \pm 2.27$  (5 dpf),  $n = 49$  neuromasts each (10 fish each); *nlsEos* only:  $6.10 \pm 2.27$  (3 dpf) vs.  $10.86 \pm 2.72$  (5 dpf),  $n = 49$  neuromasts each (10 fish each); mean  $\pm$  SD; Kruskal-Wallis test, Dunn's post-test,  $p > 0.9999$  (*NTR-GFP/nlsEos* 3 dpf vs. 5 dpf),  $p < 0.0001$  (*nlsEos* only 3 dpf vs. 5 dpf). (D–F) Maximum projections of neuromasts from *sost:NTR-GFP*; *sost:nlsEos* fish following mock treatment (D; Mock), Mtz at 5 dpf (E; Mtz5), and Mtz at 3 dpf and 5 dpf (F; Mtz3/5). *Sost:NTR-GFP* cells are shown in green and *sost:nlsEos* cells are shown in magenta. Scale bar = 10  $\mu$ m. (G) Support cells per neuromast solely expressing *sost:nlsEos* following Mtz treatment. Mock:  $11.18 \pm 2.04$ ,  $n = 50$  neuromasts (10 fish); Mtz5:  $9.72 \pm 2.03$ ,  $n = 50$  neuromasts (10 fish); Mtz3/5:  $6.76 \pm 2.12$ ,  $n = 50$  neuromasts (10 fish); mean  $\pm$  SD; Kruskal-Wallis test, Dunn's post-test,  $p = 0.0288$  (Mock vs. Mtz5),  $p < 0.0001$  (Mock vs. Mtz3/5, Mtz5 vs. Mtz3/5).

DOI: <https://doi.org/10.7554/eLife.43736.015>

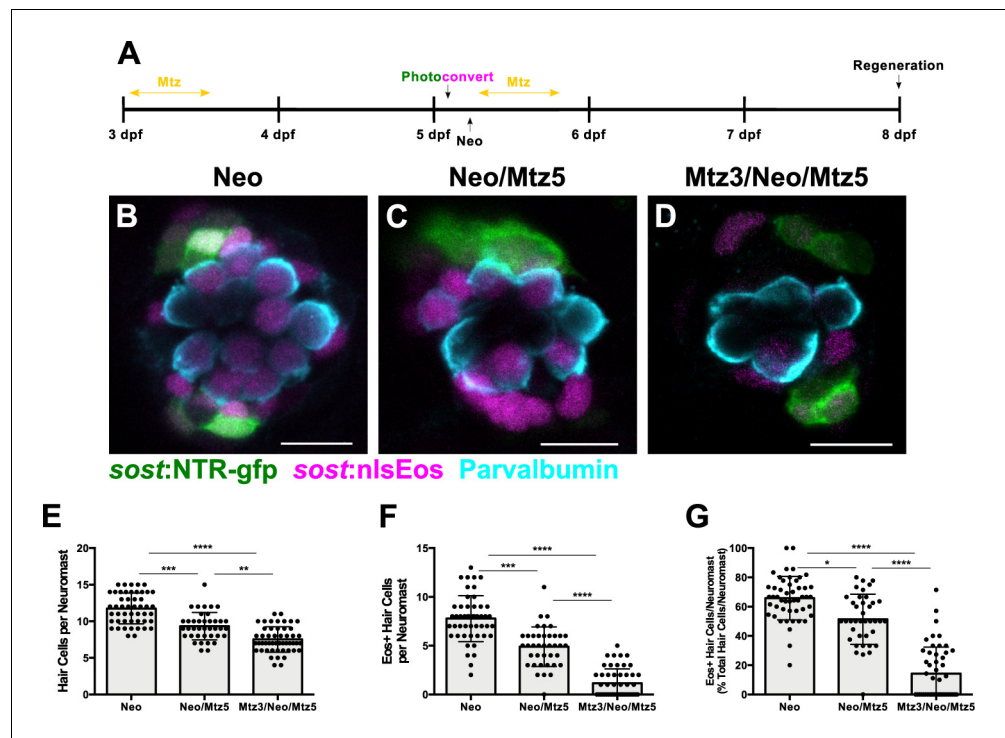

**Figure 6.** Ablation of DV cells decreases number of regenerated hair cells. (A) Timeline of DV cell-ablation experiment. Larvae were treated with Mtz at 3 dpf, photoconverted, then treated with neomycin, then treated with Mtz again at 5 dpf, and fixed and immunostained at 72 hpt (8 dpf). (B–D) Maximum projections of neuromasts from *sost:NTR-GFP*; *sost:nlsEos* fish following neomycin (B; Neo), neomycin and Mtz (C; Neo/Mtz5), and Mtz, neomycin, and Mtz treatments (D; Mtz3/Neo/Mtz5). *Sost:NTR-GFP* cells are shown in green, *sost:nlsEos* cells are shown in magenta, and anti-Parvalbumin-stained hair cells are shown in cyan. Scale bar = 10  $\mu$ m. (E) Total hair cells per neuromast following regeneration. Neo:  $11.73 \pm 2.10$ ,  $n = 49$  neuromasts (10 fish); Neo/Mtz5:  $9.33 \pm 1.88$ ,  $n = 39$  neuromasts (8 fish); Mtz3/Neo/Mtz5:  $7.52 \pm 1.74$ ,  $n = 50$  neuromasts (10 fish); mean  $\pm$  SD; Kruskal-Wallis test, Dunn's post-test,  $p=0.0001$  (Neo vs. Neo/Mtz5),  $p<0.0001$  (Neo vs. Mtz3/Neo/Mtz5),  $p=0.0016$  (Neo/Mtz5 vs. Mtz3/Neo/Mtz5). (F) *Sost:nlsEos*-positive hair cells per neuromast following regeneration. Neo:  $7.78 \pm 2.36$ ,  $n = 49$  neuromasts (10 fish); Neo/Mtz5:  $4.90 \pm 2.02$ ,  $n = 39$  neuromasts (eight fish); Mtz3/Neo/Mtz5:  $1.16 \pm 1.46$ ,  $n = 50$  neuromasts (10 fish); mean  $\pm$  SD; Kruskal-Wallis test, Dunn's post-test,  $p=0.0003$  (Neo vs. Neo/Mtz5),  $p<0.0001$  (Neo vs. Mtz3/Neo/Mtz5, Neo/Mtz5 vs. Mtz3/Neo/Mtz5). (G) Percentage of hair cells per neuromast labeled by *sost:nlsEos* following regeneration. Neo:  $65.81 \pm 14.89$ ,  $n = 49$  neuromasts (10 fish); Neo/Mtz5:  $51.40 \pm 17.17$ ,  $n = 39$  neuromasts (8 fish); Mtz3/Neo/Mtz5:  $14.29 \pm 18.10$ ,  $n = 50$  neuromasts (10 fish); mean  $\pm$  SD; Kruskal-Wallis test, Dunn's post-test,  $p=0.0147$  (Neo vs. Neo/Mtz5),  $p<0.0001$  (Neo vs. Mtz3/Neo/Mtz5, Neo/Mtz5 vs. Mtz3/Neo/Mtz5).

DOI: <https://doi.org/10.7554/eLife.43736.017>

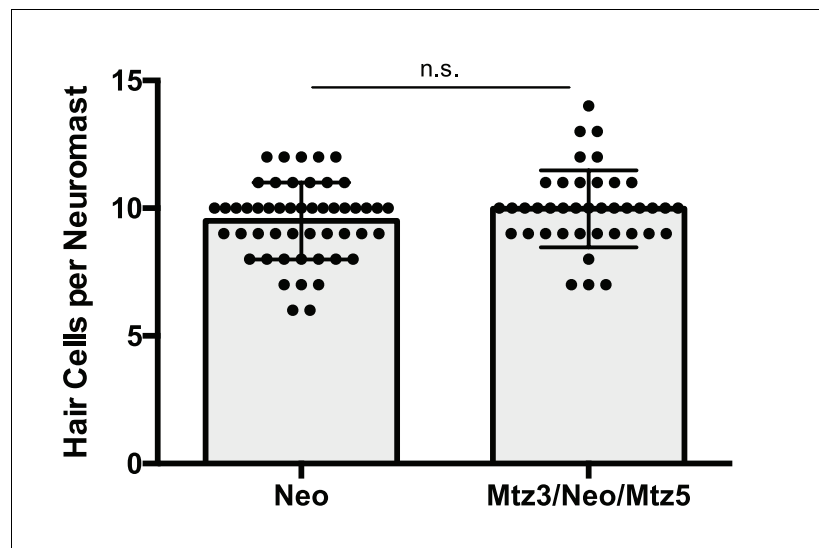

**Figure 6—figure supplement 1.** Mtz treatment does not inherently impact hair cell regeneration. Total number of hair cells per neuromast following regular hair cell regeneration (Neo) or DV cell-ablated regeneration (Mtz3/Neo/Mtz5) in non-transgenic siblings of *sost:NTR-GFP* fish. Neo:  $9.5 \pm 1.50$ ,  $n = 50$  neuromasts (10 fish); Mtz3/Neo/Mtz5:  $9.98 \pm 1.51$ ,  $n = 40$  neuromasts (eight fish); mean  $\pm$ SD; Mann Whitney U test,  $p=0.2317$ .

DOI: <https://doi.org/10.7554/eLife.43736.018>

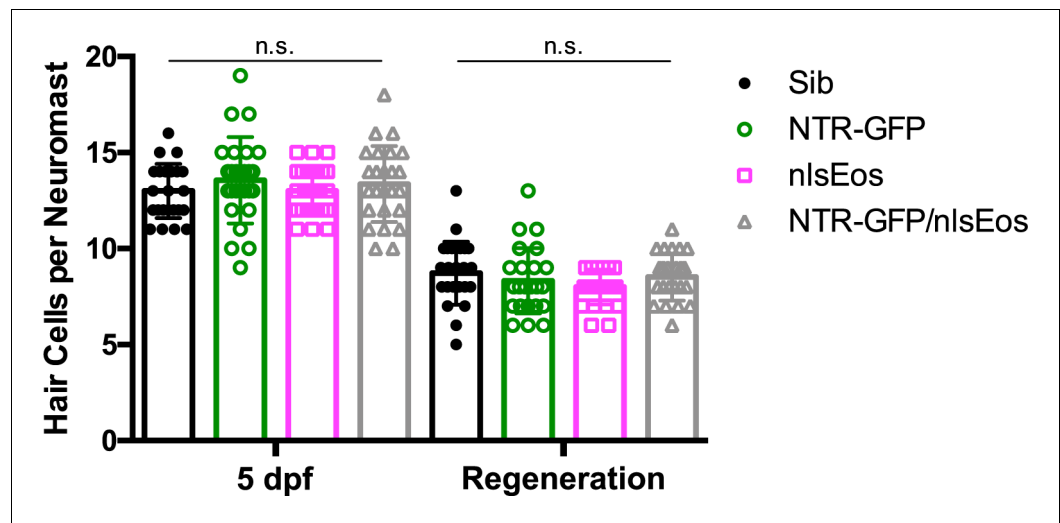

**Figure 6—figure supplement 2.** Hair cell development and regeneration is unaffected in fish expressing both *sost:NTR-GFP* and *sost:nlsEos*. Total number of FM 1-43FX-labeled hair cells per neuromast at 5 dpf or following hair cell regeneration (72 hpt) in *sost:NTR-GFP* fish (NTR-GFP), *sost:nlsEos* fish (nlsEos), *sost:NTR-GFP; sost:nlsEos* fish (NTR-GFP/nlsEos), and non-transgenic siblings (Sib). 5 dpf:  $13.00 \pm 1.41$  (Sib) vs.  $13.56 \pm 2.26$  (NTR-GFP) vs.  $13.00 \pm 1.26$  (nlsEos) vs.  $13.36 \pm 1.98$  (NTR-GFP/nlsEos),  $n = 25$  neuromasts each (5 fish each); Regeneration:  $8.72 \pm 1.65$  (Sib) vs.  $8.32 \pm 1.70$  (NTR-GFP) vs.  $8.00 \pm 0.91$  (nlsEos) vs.  $8.52 \pm 1.23$  (NTR-GFP/nlsEos),  $n = 25$  neuromasts each (5 fish each); mean  $\pm$  SD; Kruskal-Wallis test, Dunn's post-test; 5 dpf:  $p > 0.9999$  (all comparisons); Regeneration:  $p=0.4448$  (Sib vs. nlsEos),  $p>0.9999$  (all other comparisons).

DOI: <https://doi.org/10.7554/eLife.43736.020>

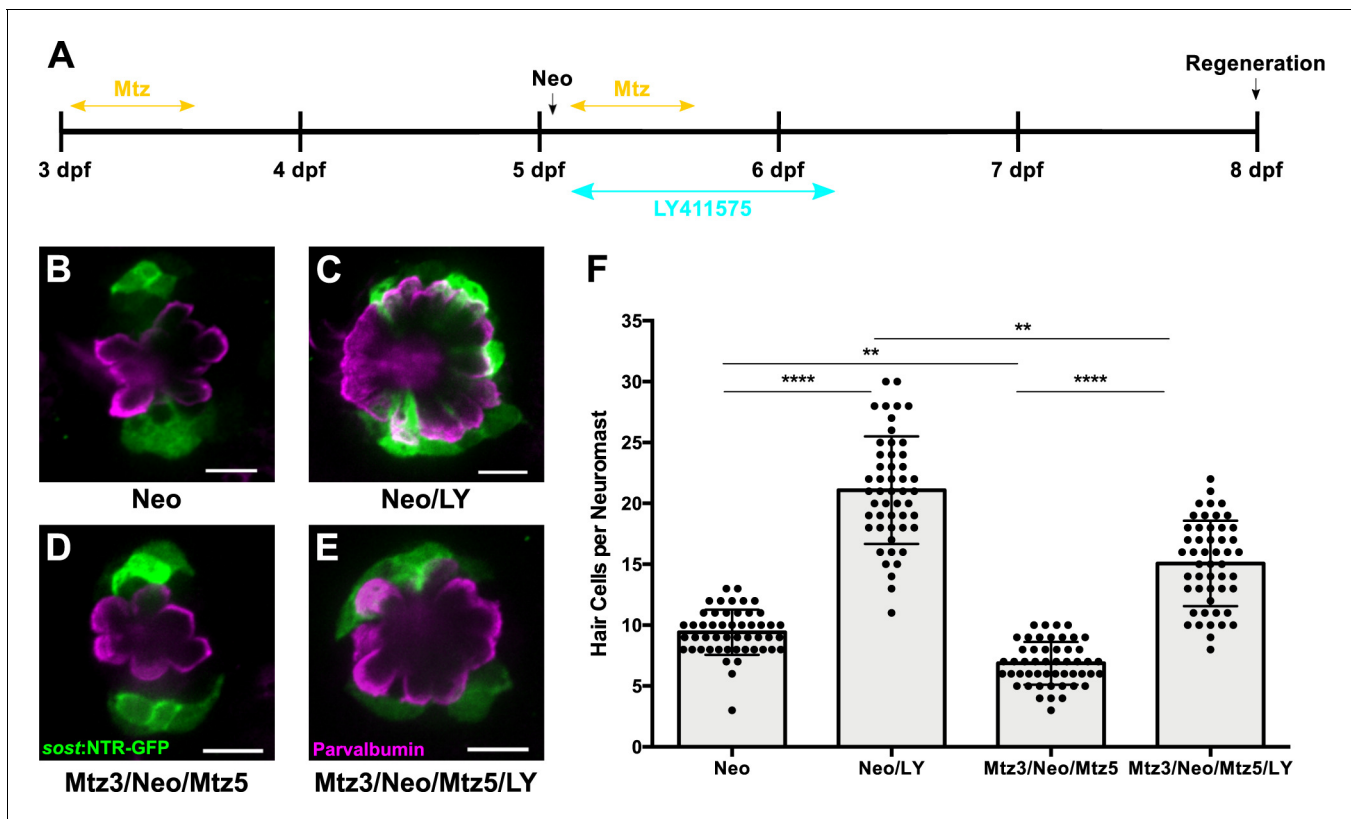

**Figure 7.** DV cell-ablation reduces the number of supernumerary hair cells formed during Notch-inhibited hair cell regeneration. (A) Timeline of dual DV cell-ablation, Notch-inhibition experiment. *Sosl:NTR-GFP* larvae were treated with Mtz at 3 dpf, treated with neomycin at 5 dpf, then co-treated with Mtz and LY411575 for 8 hr, then washed out and treated with LY411575 for 16 additional hours (24 hr total LY). (B–E) Maximum projections of *sosl:NTR-GFP* neuromasts following normal hair cell regeneration (B; Neo), Notch-inhibited hair cell regeneration (C; Neo/LY), DV cell-ablated hair cell regeneration (D; Mtz3/Neo/Mtz5), and DV cell-ablated and Notch-inhibited hair cell regeneration (E; Mtz3/Neo/Mtz5/LY). *Sosl:NTR-GFP* cells are shown in green, and anti-Parvalbumin immunostained hair cells are shown in magenta. Scale bar = 10  $\mu$ m. (F) Total number of hair cells per neuromast following hair cell regeneration. Neo:  $9.42 \pm 1.85$ ,  $n = 50$  neuromasts (10 fish); Neo/LY:  $21.08 \pm 4.42$ ,  $n = 50$  neuromasts (10 fish); Mtz3/Neo/Mtz5:  $6.86 \pm 1.76$ ,  $n = 50$  neuromasts (10 fish); Mtz3/Neo/Mtz5/LY:  $15.06 \pm 3.51$ ,  $n = 50$  neuromasts (10 fish); mean  $\pm$  SD; Kruskal-Wallis test, Dunn's post-test,  $p < 0.0001$  (Neo vs. Neo/LY; Mtz3/Neo/Mtz5 vs. Mtz3/Neo/Mtz5/LY),  $p = 0.0058$  (Neo vs. Mtz3/Neo/Mtz5),  $p = 0.0029$  (Neo/LY vs. Mtz3/Neo/Mtz5/LY).

DOI: <https://doi.org/10.7554/eLife.43736.023>

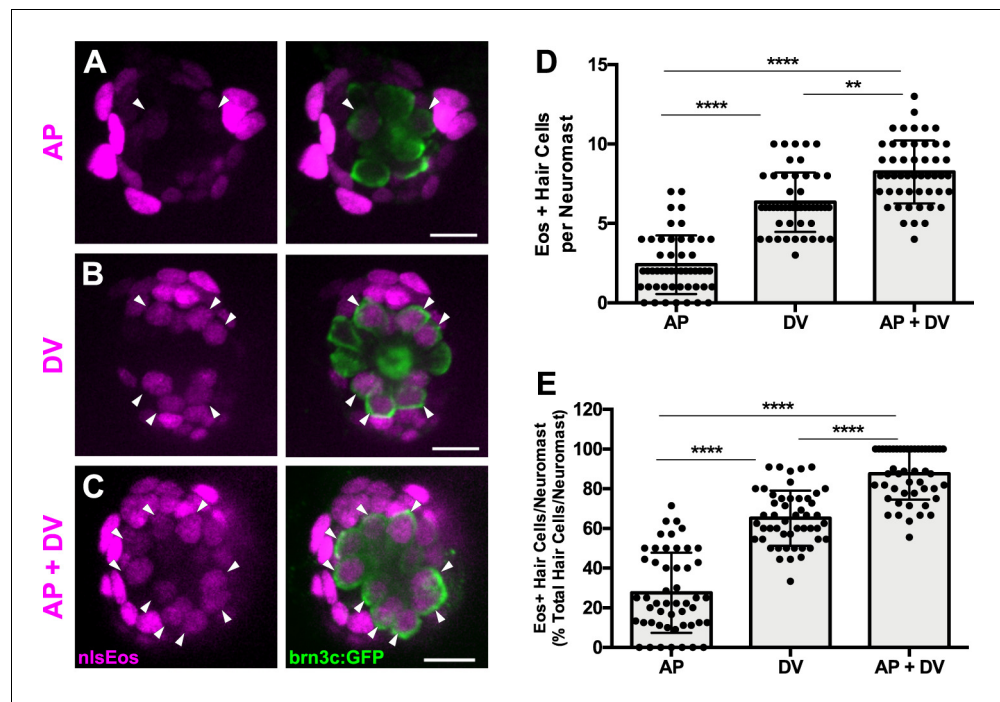

**Figure 8.** AP cells and DV cells define separate progenitor populations. (A–C) Maximum projections of neuromasts from *tnfsf10/3:nlsEos* (AP, (A), *sost:nlsEos* (DV, (B), and *tnfsf10/3:nlsEos/sost:nlsEos* fish (AP + DV, (C) following photoconversion and regeneration. Converted *nlsEos*-positive cells are shown in magenta, and *brn3c:GFP*-positive hair cells are shown in green. Arrowheads indicate *nlsEos*-positive hair cells. Scale bar = 10  $\mu$ m. (D) Number of *nlsEos*-positive hair cells per neuromast in each of the *nlsEos* lines following regeneration. *Tnfsf10/3:nlsEos* (AP):  $2.4 \pm 1.84$ ,  $n = 50$  neuromasts (10 fish); *sost:nlsEos* (DV):  $6.34 \pm 1.87$ ,  $n = 50$  neuromasts (10 fish); *tnfsf10/3:nlsEos/sost:nlsEos* (AP + DV):  $8.24 \pm 1.99$ ,  $n = 50$  neuromasts (10 fish); mean  $\pm$  SD; Kruskal-Wallis test, Dunn's post-test,  $p < 0.0001$  (AP vs. DV, AP vs. AP + DV),  $p = 0.0031$  (DV vs. AP + DV). (E) Percentage of hair cells per neuromast labeled by *nlsEos* lines following regeneration. AP:  $27.59 \pm 20.21$ ,  $n = 50$  neuromasts (10 fish); DV:  $65.16 \pm 13.89$ ,  $n = 50$  neuromasts (10 fish); AP + DV:  $87.57 \pm 13.02$ ,  $n = 50$  neuromasts (10 fish); mean  $\pm$  SD; Kruskal-Wallis test, Dunn's post-test,  $p < 0.0001$  (all comparisons).

DOI: <https://doi.org/10.7554/eLife.43736.025>

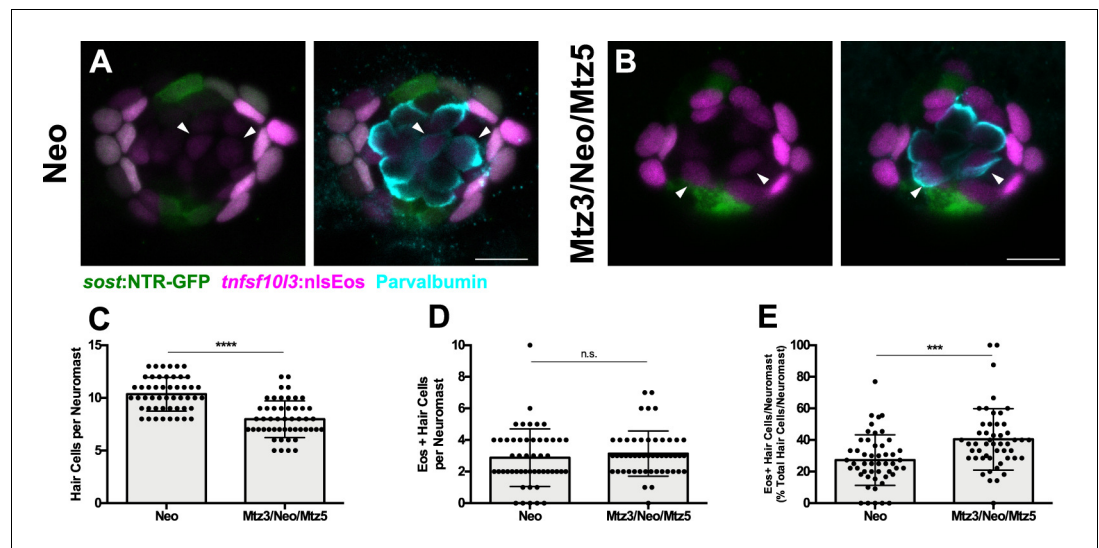

**Figure 9.** AP population doesn't compensate for the loss of the DV population during hair cell regeneration. (A–B) Maximum projections of *tnfsf10l3:nlsEos*; *sost:NTR-GFP* neuromasts following normal hair cell regeneration (A; Neo) or DV cell-ablated hair cell regeneration (B; Mtz3/Neo/Mtz5). *Sost:NTR-GFP* cells are shown in green, *tnfsf10l3:nlsEos* cells are shown in magenta, and anti-Parvalbumin-stained hair cells are shown in cyan. Arrowheads indicate nlsEos-positive hair cells. Scale bar = 10 μm. (C) Total number of hair cells per neuromast following hair cell regeneration. Neo:  $10.36 \pm 1.60$ ,  $n = 50$  neuromasts (10 fish); Mtz3/Neo/Mtz5:  $7.98 \pm 1.74$ ,  $n = 50$  neuromasts (10 fish); mean ± SD; Mann Whitney U test,  $p < 0.0001$ . (D) Number of nlsEos-positive hair cells per neuromast following hair cell regeneration. Neo:  $2.88 \pm 1.83$ ,  $n = 50$  neuromasts (10 fish); Mtz3/Neo/Mtz5:  $3.14 \pm 1.43$ ,  $n = 50$  neuromasts (10 fish); mean ± SD; Mann Whitney U test,  $p = 0.3855$ . (E) Percentage of hair cells per neuromast labeled by nlsEos following hair cell regeneration. Neo:  $27.26 \pm 16.00$ ,  $n = 50$  neuromasts (10 fish); Mtz3/Neo/Mtz5:  $40.43 \pm 19.44$ ,  $n = 50$  neuromasts (10 fish); mean ± SD; Mann Whitney U test,  $p = 0.0002$ .

DOI: <https://doi.org/10.7554/eLife.43736.027>



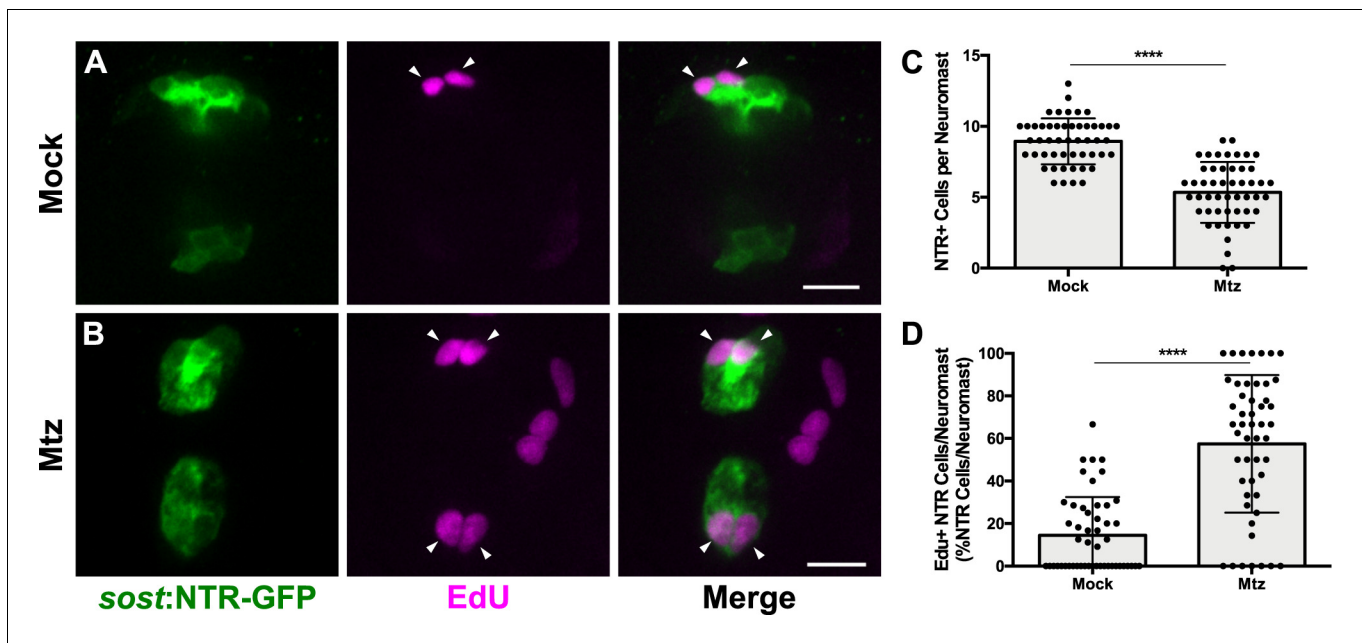

**Figure 10.** DV population regenerates via proliferation. (A–B) Maximum projections of neuromasts from *sost:NTR-GFP* fish either untreated (A; Mock) or treated with 10 mM Mtz (B; Mtz). *Sost:NTR-GFP* cells are shown in green and EdU-positive cells are shown in magenta. Arrowheads indicate EdU-positive *sost:NTR-GFP* cells. Scale bar = 10  $\mu$ m. (C) Total number of *sost:NTR-GFP* cells per neuromast following DV cell regeneration. Mock:  $8.94 \pm 1.62$ , n = 50 neuromasts (10 fish); Mtz:  $5.34 \pm 2.14$ , n = 50 neuromasts (10 fish); mean  $\pm$  SD; Mann Whitney U test, p < 0.0001. (D) Percentage of *sost:NTR-GFP* cells per neuromast labeled by EdU following DV cell regeneration. Mock:  $14.47 \pm 17.95$ , n = 50 neuromasts (10 fish); Mtz:  $57.49 \pm 32.34$ , n = 50 neuromasts (10 fish); mean  $\pm$  SD; Mann Whitney U test, p < 0.0001.

DOI: <https://doi.org/10.7554/eLife.43736.029>

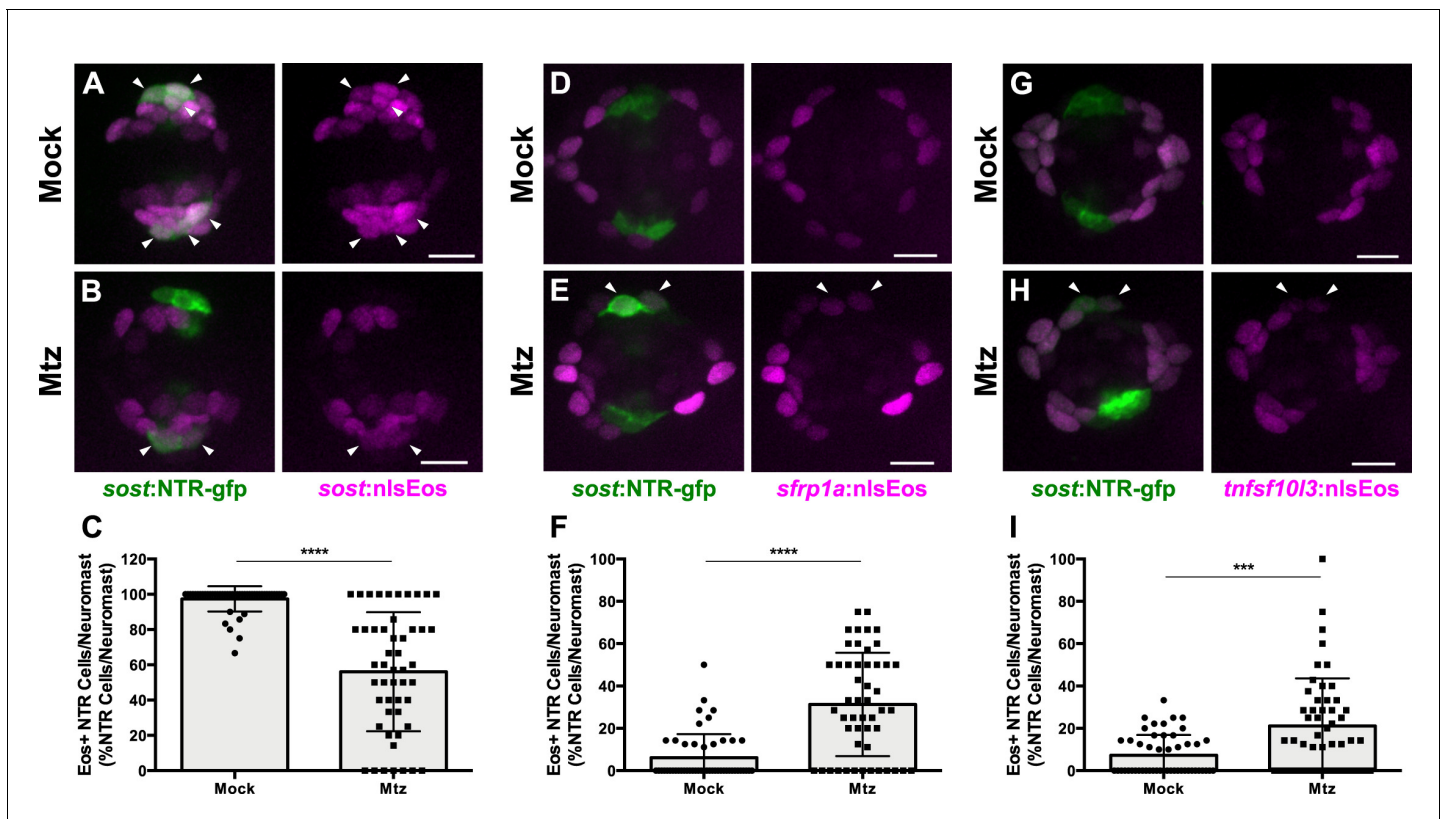

**Figure 11.** DV cells are replenished by other support cell populations. (A–B, D–E, G–H) Maximum projections of neuromasts expressing *sost:NTR-GFP* and *sost:nlsEos* (A–B), *sfrp1a:nlsEos* (D–E), and *tnfsf10l3:nlsEos* (G–H) in the absence of (A, D, G; Mock) or following Mtz-induced DV cell ablation (B, E, H; Mtz). *Sost:NTR-GFP* cells are shown in green and *nlsEos*-positive cells are shown in magenta. Arrowheads indicate *nlsEos*-positive *sost:NTR-GFP* cells. Scale bar = 10  $\mu$ m. (C) Percentage of *sost:NTR-GFP* cells per neuromast labeled by *sost:nlsEos* following DV cell regeneration. Mock: 97.39  $\pm$  7.14, n = 50 neuromasts (10 fish); Mtz: 56.09  $\pm$  33.72, n = 50 neuromasts (10 fish); mean  $\pm$  SD; Mann Whitney U test, p<0.0001. (F) Percentage of *sost:NTR-GFP* cells per neuromast labeled by *sfrp1a:nlsEos* following DV cell regeneration. Mock: 6.15  $\pm$  11.14, n = 50 neuromasts (10 fish); Mtz: 31.27  $\pm$  24.41, n = 50 neuromasts (10 fish); mean  $\pm$  SD; Mann Whitney U test, p<0.0001. (I) Percentage of *sost:NTR-GFP* cells per neuromast labeled by *tnfsf10l3:nlsEos* following DV cell regeneration. Mock: 7.31  $\pm$  9.55, n = 50 neuromasts (10 fish); Mtz: 21.11  $\pm$  22.51, n = 50 neuromasts (10 fish); mean  $\pm$  SD; Mann Whitney U test, p=0.0004.

DOI: <https://doi.org/10.7554/eLife.43736.031>

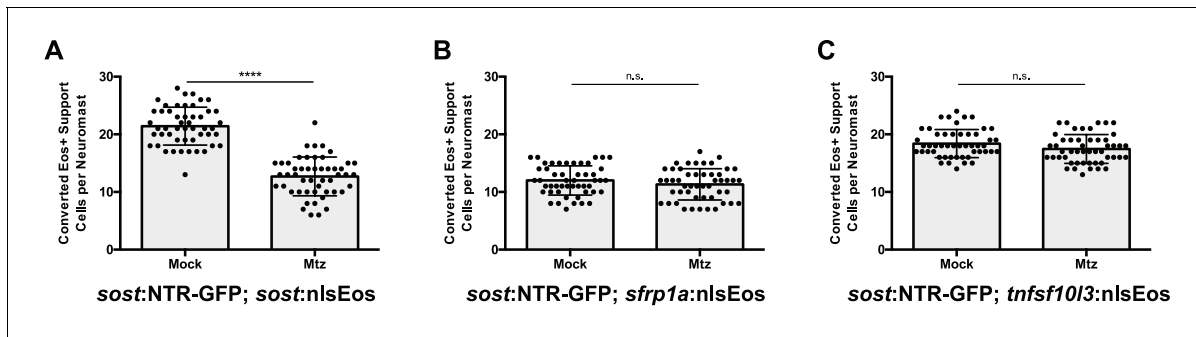

**Figure 11—figure supplement 1.** Ablation of DV cells does not decrease the number of other support cell populations. (A) Total number of *sost*:nlsEos-positive support cells per neuromast following DV cell regeneration. Mock:  $21.42 \pm 3.29$ ,  $n = 50$  neuromasts (10 fish); Mtz:  $12.70 \pm 3.35$ ,  $n = 50$  neuromasts (10 fish); mean  $\pm$  SD; Mann Whitney U test,  $p < 0.0001$ . (B) Total number of *sfrp1a*:nlsEos-positive support cells per neuromast following DV cell regeneration. Mock:  $12.00 \pm 2.54$ ,  $n = 50$  neuromasts (10 fish); Mtz:  $11.32 \pm 2.71$ ,  $n = 50$  neuromasts (10 fish); mean  $\pm$  SD; Mann Whitney U test,  $p = 0.2413$ . (C) Total number of *tnfrsf10l3*:nlsEos-positive support cells per neuromast following DV cell regeneration. Mock:  $18.40 \pm 2.44$ ,  $n = 50$  neuromasts (10 fish); Mtz:  $17.46 \pm 2.49$ ,  $n = 50$  neuromasts (10 fish); mean  $\pm$  SD; Mann Whitney U test,  $p = 0.0699$ .

DOI: <https://doi.org/10.7554/eLife.43736.032>

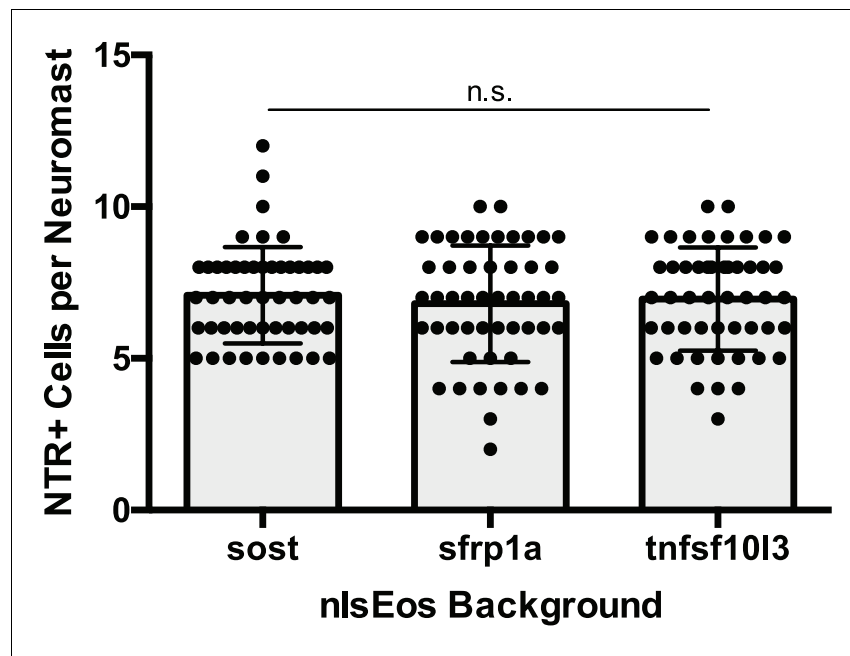

**Figure 11—figure supplement 2.** Expression of nlsEos transgenes does not alter number of *sost*:NTR-GFP cells. Total number of *sost*:NTR-GFP cells per neuromast in *sost*:nlsEos (*sost*), *sfrp1a*:nlsEos (*sfrp1a*), and *tnfsf10l3*:nlsEos (*tnfsf10l3*) fish. *Sost*:  $7.08 \pm 1.59$ ,  $n = 50$  neuromasts (10 fish); *Sfrp1a*:  $6.80 \pm 1.92$ ,  $n = 50$  neuromasts (10 fish); *Tnfsf10l3*:  $6.96 \pm 1.70$ ,  $n = 50$  neuromasts (10 fish); mean  $\pm$  SD; Kruskal-Wallis test, Dunn's post-test,  $p > 0.9999$  (all comparisons).

DOI: <https://doi.org/10.7554/eLife.43736.034>

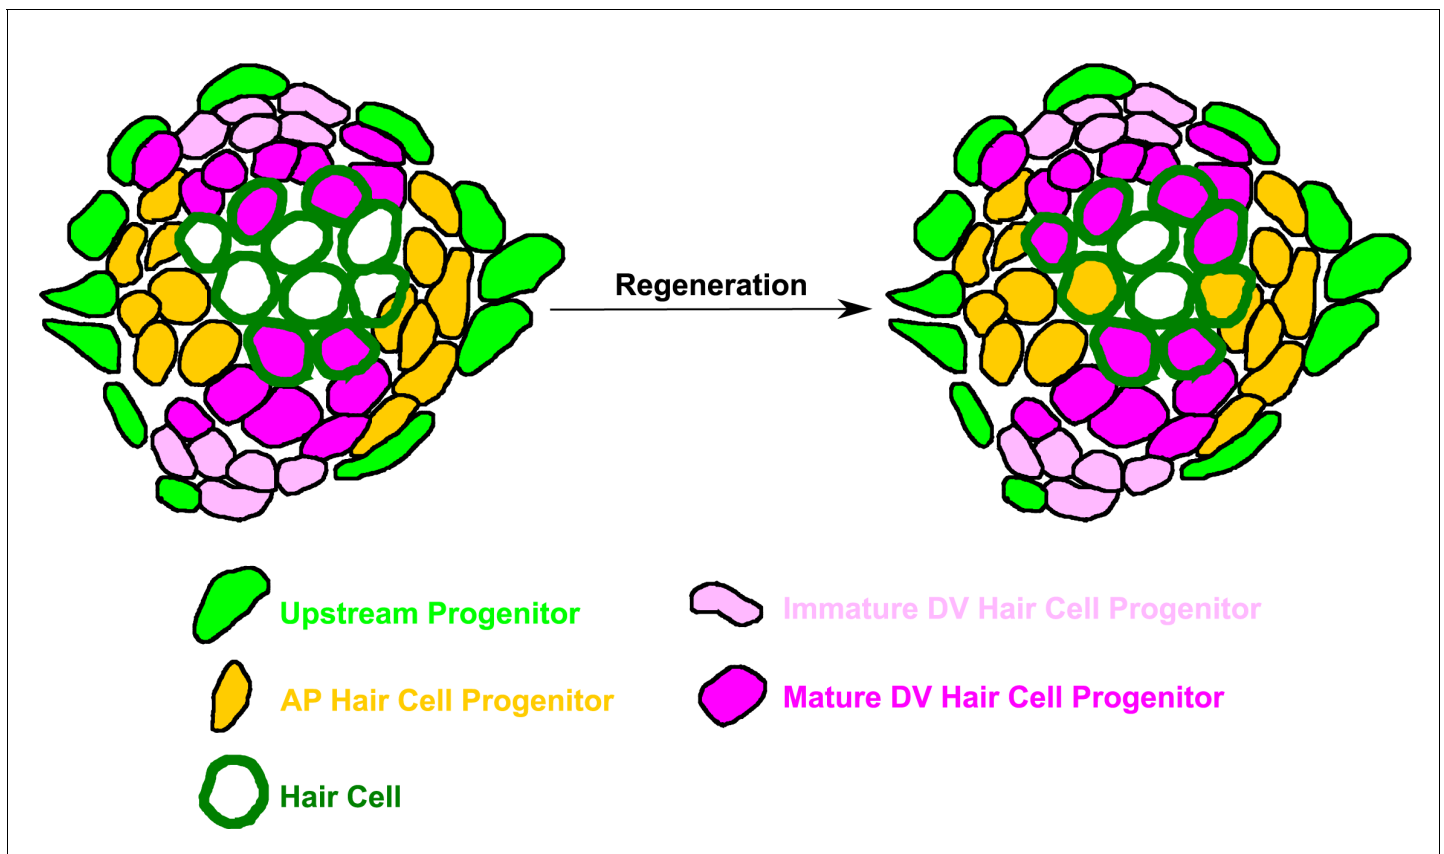

**Figure 12.** Model of neuromast progenitor identity. *Sost:nlsEos*-positive cells, located in the dorsoventral (DV) region of the neuromast, contain immature hair cell progenitors (shown in light pink) and mature hair cell progenitors (shown in magenta). Immature hair cell progenitors do not directly generate new hair cells (outlined in dark green) during regeneration, but do become mature hair cell progenitors, which comprise the majority of hair cell progenitors (see magenta-filled hair cells following regeneration). *Tnfrsf10l3:nlsEos*-positive cells (shown in gold), located in the anteroposterior (AP) region of the neuromast, also serve as hair cell progenitors (see gold-filled hair cells following regeneration). Both of these populations are regulated by Notch signaling, and both can replenish immature hair cell progenitors. Finally, *sfrp1a:nlsEos*-positive cells (shown in light green), located in the periphery, do not serve as hair cell progenitors, nor are they regulated by Notch signaling. However, they are capable of replenishing immature hair cell progenitors, and can thus be classified as an upstream progenitor.

DOI: <https://doi.org/10.7554/eLife.43736.037>
