# Supplementary figures and images for: Distinct progenitor populations mediate regeneration in the zebrafish lateral line
Source: eLife journal article supplement (doi:10.7554/elife.43736), 2019-03-05

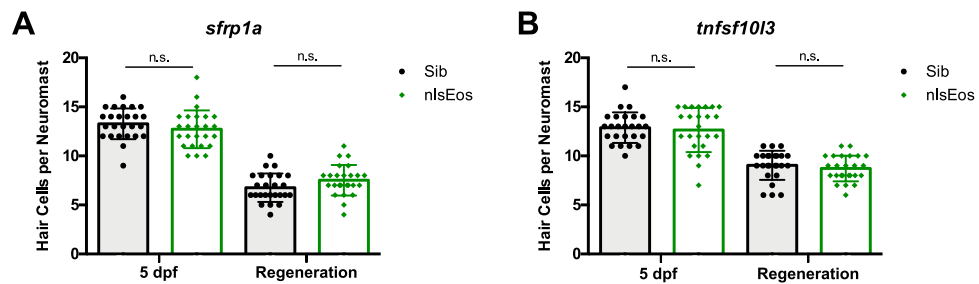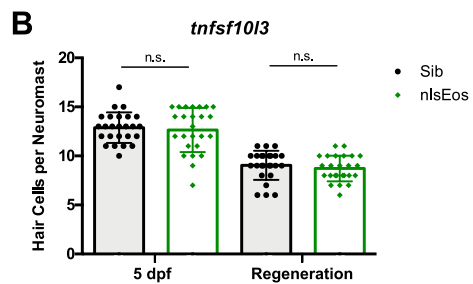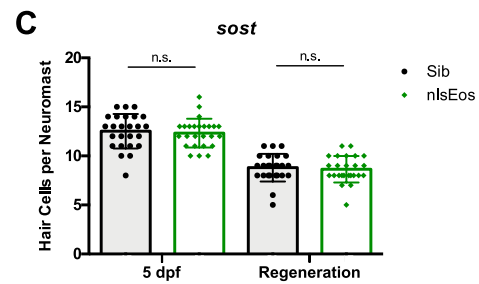

Supplement: supp [file elife-43736-supp-v1.zip]

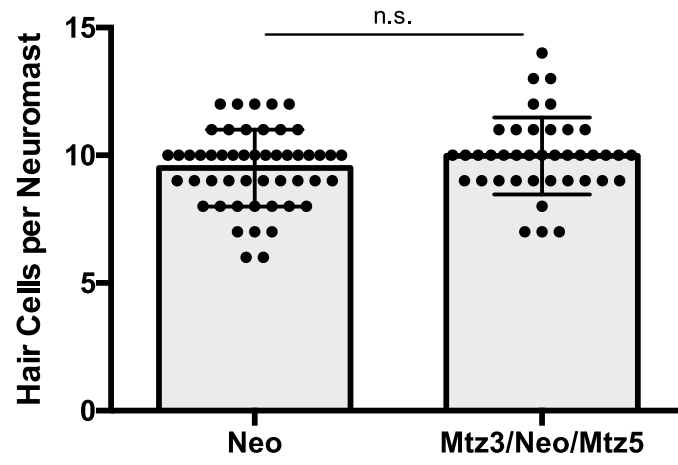

Supplement: supp [file elife-43736-supp-v1.zip]

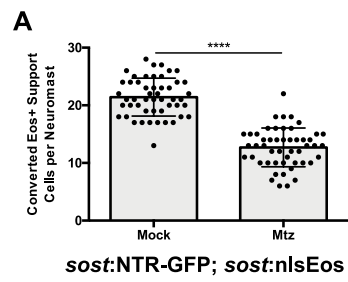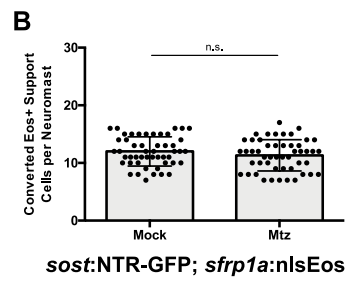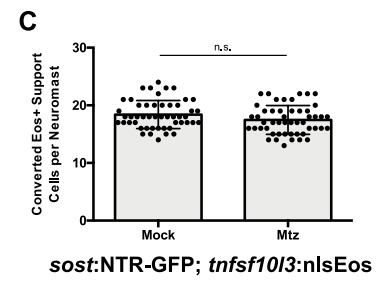

Supplement: supp [file elife-43736-supp-v1.zip]

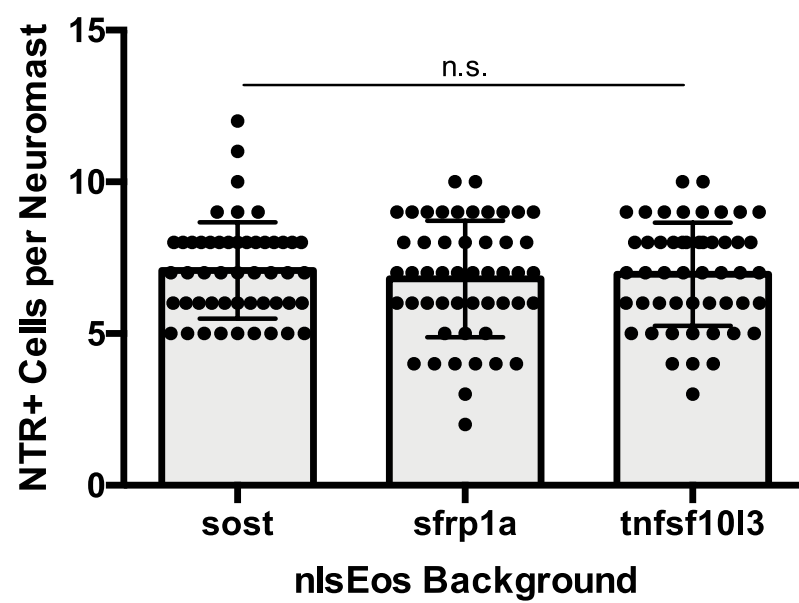

Supplement: supp [file elife-43736-supp-v1.zip]

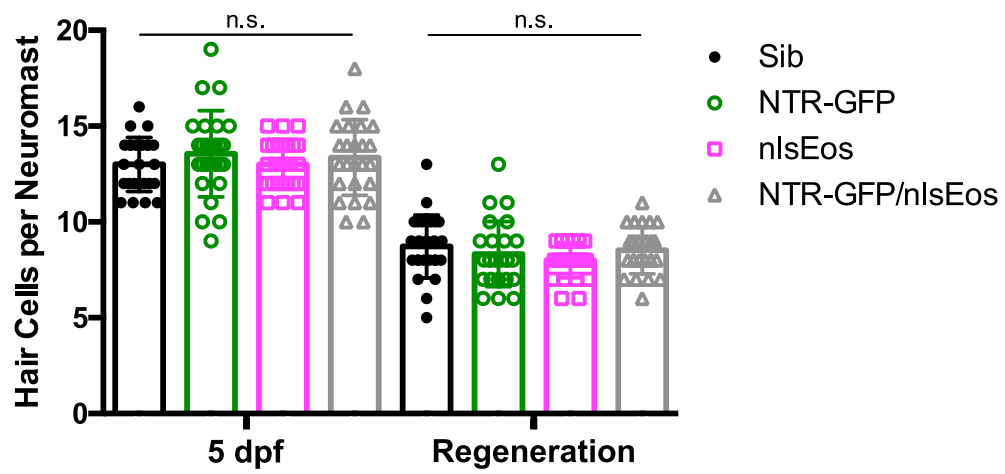

Supplement: supp [file elife-43736-supp-v1.zip]

*tnfsf10/3:nlsEos*

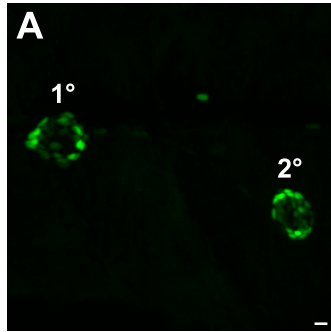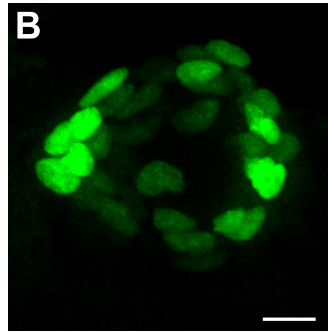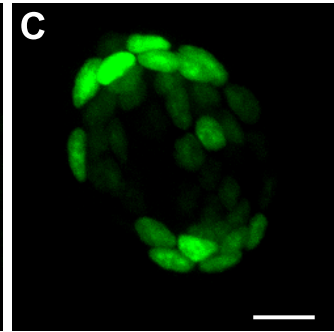

*sost:nlsEos*

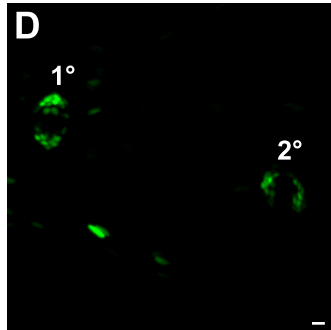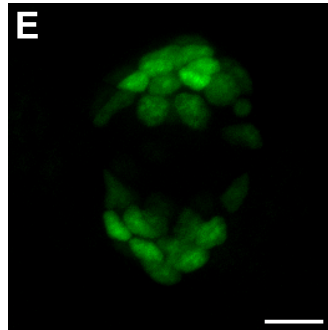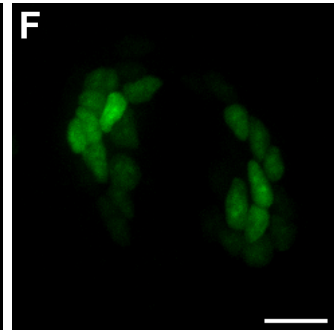

Low Mag

Primary

Secondary

Supplement: supp [file elife-43736-supp-v1.zip]

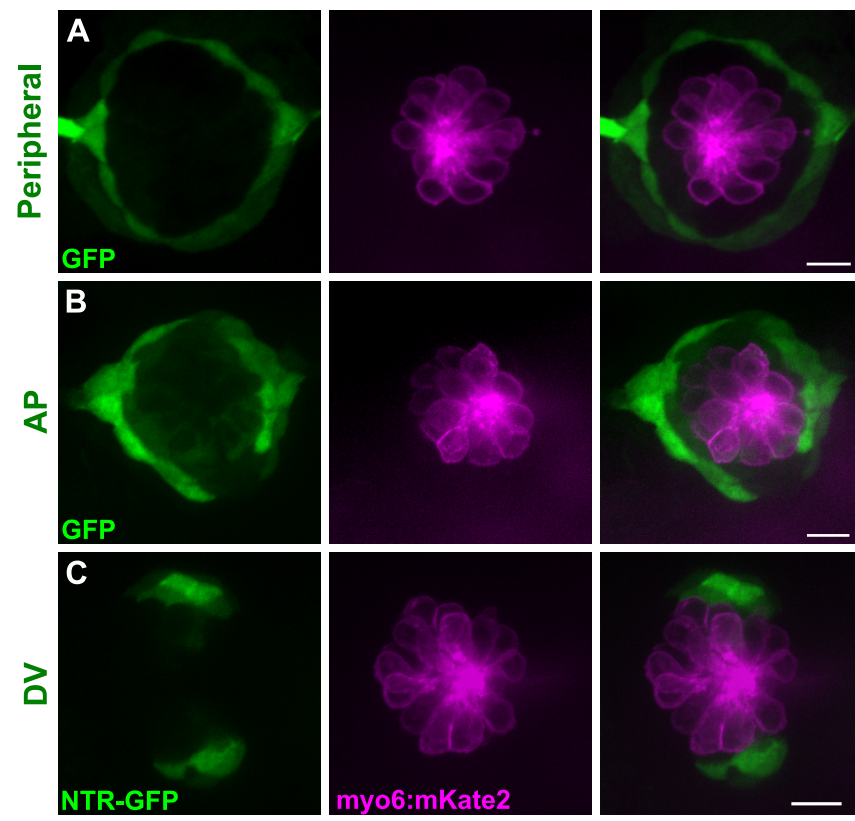

Supplement: supp [file elife-43736-supp-v1.zip]
